1

2

## **HVEM structures and mutants reveal distinct functions of binding to LIGHT**

3

### **and BTLA/CD160**

4

5 Weifeng Liu<sup>1,\*</sup>, Ting-Fang Chou<sup>2,\*</sup>, Sarah C. Garrett-Thomson<sup>1</sup>, Goo-Young Seo<sup>2</sup>, Elena

6 Fedorov<sup>1</sup>, Udupi A. Ramagopal<sup>1</sup>, Jeffrey B. Bonanno<sup>1</sup>, Kiyokazu Kakugawa<sup>3</sup>, Hilde

7

Cheroutre<sup>2</sup>, Mitchell Kronenberg<sup>2,4,#</sup>, Steven C. Almo<sup>1,5,#</sup>

8

9 \* Co-first author.

10

11 <sup>1</sup>Department of Biochemistry, Albert Einstein College of Medicine, 1300 Morris Park  
12 Avenue, Bronx, NY 10461, USA.

13 <sup>2</sup>La Jolla Institute for Immunology, 9420 Athena Circle, La Jolla, CA 92037, USA.

14 <sup>3</sup>Laboratory for Immune Crosstalk, RIKEN Center for Integrative Medical Sciences,  
15 Yokohama, Japan

16 <sup>4</sup>Division of Biological Sciences, University of California San Diego, La Jolla, CA 92093,  
17 USA.

18

19 <sup>5</sup>Department of Physiology and Biophysics, Albert Einstein College of Medicine, 1300  
20 Morris Park Avenue, Bronx, NY 10461, USA.

21

22

23 # Co-corresponding authors:

24 Mitchell Kronenberg Email: [mitch@lji.org](mailto:mitch@lji.org)

25 Steven C. Almo Email: [steve.almo@einsteinmed.org](mailto:steve.almo@einsteinmed.org)

26

27 **Abstract**

28 HVEM is a TNF (tumor necrosis factor) receptor contributing to a broad range of immune  
29 functions involving diverse cell types. It interacts with a TNF ligand, LIGHT, and  
30 immunoglobulin (Ig) superfamily members BTLA and CD160. Assessing the functional  
31 impact of HVEM binding to specific ligands in different settings has been complicated by  
32 the multiple interactions of HVEM and HVEM binding partners. To dissect the molecular  
33 basis for multiple functions, we determined crystal structures that reveal the distinct HVEM  
34 surfaces that engage LIGHT or BTLA/CD160, including the human HVEM:LIGHT:CD160  
35 ternary complex, with HVEM interacting simultaneously with both binding partners. Based  
36 on these structures, we generated mouse HVEM mutants that selectively recognized  
37 either the TNF or Ig ligands *in vitro*. Knock-in mice expressing these mutants maintain  
38 expression of all the proteins in the HVEM network, yet they demonstrate selective  
39 functions for LIGHT in the clearance of bacteria in the intestine and for the Ig ligands in  
40 the amelioration of liver inflammation.

41

## 42 Introduction

43 Members of the tumor necrosis factor receptor super family (TNFRSF) regulate  
44 diverse processes, but in several cases understanding these processes is hampered by  
45 the ability of receptors and ligands to bind to multiple partners (Bossen et al., 2006). One  
46 prominent example is provided by the herpes virus entry mediator (HVEM), or TNFRSF14,  
47 initially identified as important for entry of herpes simplex virus (HSV) through recognition  
48 of HSV glycoprotein D (gD) (Montgomery et al., 1996; Whitbeck et al., 1997).  
49 Subsequently, a TNF super family (TNFSF) ligand for HVEM was characterized, known  
50 as **LIGHT** (homologous to lymphotoxin, exhibits inducible expression and competes with  
51 HSV glycoprotein D for binding to herpesvirus entry mediator, a receptor expressed  
52 on T lymphocytes) or TNFSF14 (Harrop et al., 1998a; Harrop et al., 1998b). Engagement  
53 of HVEM by LIGHT is implicated in multiple responses. For example, in T lymphocytes, it  
54 stimulates proliferation, cytokine production, and the development of CD8 T cell memory  
55 (Desai et al., 2017; Harrop et al., 1998a; Harrop et al., 1998b; Tamada et al., 2000). LIGHT  
56 also engages HVEM to stimulate cytokine production by type 3 innate lymphoid cells (ILC3)  
57 (Seo et al., 2018) and in keratinocytes it binds HVEM to stimulate periostin, contributing  
58 to atopic dermatitis (Herro et al., 2018).

59 LIGHT also binds to another TNFRSF member, lymphotoxin-beta receptor (LT $\beta$ R  
60 or TNFRSF3), which is expressed by stromal and myeloid lineages. This interaction  
61 regulates lymph node formation, dendritic cell migration (Zhu et al., 2011), and IL-12  
62 production by DC (Okwor et al., 2015). The LIGHT-LT $\beta$ R interaction also has been  
63 reported to induce apoptosis of cancer cells (Zhai et al., 1998), it is important for  
64 macrophage activity in wound healing (Petreaca et al., 2012) and it influences lipid  
65 metabolism by regulating hepatic lipase expression in hepatocytes (Chellan et al., 2013;  
66 Lo et al., 2007). Furthermore, LIGHT participates in additional processes in which a

67 specific receptor has not been implicated, including the resolution of inflammation in an  
68 experimental autoimmune encephalomyelitis (Mana et al., 2013), the induction of  
69 adipocyte differentiation (Tiller et al., 2011), and the induction of osteoclastogenic signals  
70 (Brunetti et al., 2014; Hemingway et al., 2013).

71 HVEM also binds immunoglobulin superfamily (IgSF) molecules B and T  
72 lymphocyte attenuator (BTLA or CD272) and CD160. HVEM engages in bidirectional  
73 signaling, serving not only as a receptor, but it also may act as a ligand for IgSF receptor  
74 signaling (Steinberg et al., 2011). HVEM:BTLA engagement delivers an overall inhibitory  
75 immune response (Murphy and Murphy, 2010), while the interaction between HVEM and  
76 CD160 on T cells can either attenuate the activities of specific subsets of CD4 T  
77 lymphocytes or enhance the activity of CD8 T cells (Cai et al., 2008; Tan et al., 2018).  
78 Notably, engagement of CD160 by HVEM also controls cytokine production by NK cells  
79 and is important for mucosal immunity (Shui et al., 2012; Tu et al., 2015; Whitbeck et al.,  
80 1997). Furthermore, HVEM was reported to interact with synaptic adhesion-like molecule  
81 5 (SALM5), mainly expressed in brain, to confer immune-privilege in the central nervous  
82 system (Zhu et al., 2016). These different interactions are summarized in **Fig. S1**. CD160  
83 also binds to some major histocompatibility complex (MHC) class I molecules (Le  
84 Bouteiller et al., 2002; Maeda et al., 2005), further expanding the complexity of this protein-  
85 protein interaction network.

86 The promiscuous interactions of HVEM pose challenges for characterizing the  
87 mechanistic contributions of HVEM-associated pathways in different immune responses  
88 and diseases. Conditional knockouts can isolate effects in particular cell types, but  
89 elimination of expression of one protein, for example LIGHT, not only abolishes LIGHT-  
90 HVEM binding, but also eliminates LIGHT-LT $\beta$ R binding and may also indirectly affect  
91 HVEM interactions with its IgSF ligands by altering the availability of HVEM (Steinberg et  
92 al., 2011). This complexity may make it difficult to reach definitive conclusions about the

93 relevant binding partners responsible for a phenotype and it may account for  
94 circumstances in which the phenotypes in whole body receptor and corresponding ligand  
95 knockouts did not agree (Giles et al., 2018). Herein, in order to better understand this  
96 receptor-ligand network, we set out to test mutants of HVEM with selective ligand binding.  
97 Based on multiple crystal structures, including the human HVEM:LIGHT:CD160 ternary  
98 complex we performed extensive epitope mapping and engineering of selective mHVEM  
99 mutants. HVEM muteins were expressed in mice to show definitively that selective HVEM-  
100 ligand interactions are important in resistance to mucosal bacterial infection and in  
101 prevention of liver inflammation in a context where all members of the protein network  
102 were present and only selective interactions were disrupted.

103

## 104 **RESULTS**

### 105 ***Human HVEM:LIGHT complex exists as a 3:3 assembly***

106 The extracellular domains of human LIGHT (denoted as hLIGHT; ~18 KDa for the  
107 monomer and ~54 KDa for the homotrimer) and human HVEM (denoted as hHVEM; ~15  
108 KDa) were purified to homogeneous, monodisperse species as indicated by analytical size  
109 exclusion chromatography (SEC) (**Fig. 1 A**). Mixing equal molar equivalents of hLIGHT  
110 and hHVEM monomers, resulted in a single species with an apparent molecular weight of  
111 ~100 KDa, consistent with the formation of a 3:3 stoichiometric hHVEM:hLIGHT assembly  
112 in solution (**Fig. 1, A-C**).

113 The crystal structure of the hHVEM:hLIGHT complex was determined to the  
114 resolution of 2.30 Å by molecular replacement using Protein Data Bank (PDB) entries  
115 4KG8 (hLIGHT) and 4FHQ (hHVEM) as starting search models (**Table 1**). The asymmetric  
116 unit of the hHVEM:hLIGHT crystals contains six independent chains of hLIGHT and six  
117 independent chains of hHVEM, which form two classical 3:3 TNF:TNFR hexameric  
118 assemblies with three-fold symmetry (**Fig. S2, A-C**); a single 3:3 TNF:TNFR hexameric

119 assembly is consistent with SEC analysis. The hHVEM ectodomain is composed of four  
120 cysteine rich domains (CRDs), while hLIGHT forms a compact homotrimeric structure. In  
121 the hexameric assembly, CRD1, CRD2 and CRD3 of hHVEM engage hLIGHT via  
122 surfaces contributed by two adjacent hLIGHT protomers (**Fig. 1 B and S2 C**). The two  
123 independent hHVEM:hLIGHT hexameric complexes exhibit similar overall structures with  
124 a RMSD of 1.8 Å for 742 aligned C<sub>α</sub> atoms. The regions with the greatest structural  
125 divergence reside in the N- and C-termini of the proteins, which do not directly contribute  
126 to the binding interface. The hHVEM:hLIGHT recognition interfaces are highly similar  
127 within and between the two complexes (**Fig. S2 B**), and the following discussion is based  
128 on the hLIGHT G and H chains, and hHVEM J chain (**Fig. S2 A**).

129

### 130 ***The binding interface between human HVEM and LIGHT***

131 The structure of the hHVEM:hLIGHT complex shows that HVEM CRD1 and CRD2  
132 domains interact with the DE, AA' and GH loops of LIGHT, while HVEM CRD3 interacts  
133 with LIGHT CD and EF loops (**Fig. 1, D-F and S2, C-D**).

134 The interaction between the hHVEM CRD2 and the hLIGHT DE loop appears to  
135 be important for human HVEM:LIGHT recognition, as it contributes multiple potential polar  
136 contacts. The main chain amide group of hHVEM A85 forms a hydrogen bond with the  
137 side chain hydroxyl group of hLIGHT Y173 (**Fig. 1 D and S2 D**), consistent with the  
138 behavior of the Y173F mutation in hLIGHT, which significantly diminishes the binding of  
139 hLIGHT with hHVEM (Rooney et al., 2000). Human HVEM N88 does not directly contact  
140 hLIGHT Y173, but is relatively close, and the hHVEM N88A mutation attenuated binding  
141 to hLIGHT (**Fig. S3, A-D**). The hHVEM G89 main chain amide group forms a hydrogen  
142 bond with the main chain oxygen of hLIGHT R172 (**Fig. 1 D and S2 D**). HVEM H86 side  
143 chain imidazole functionality makes a polar contact with the side chain carboxyl group of

144 hLIGHT E175 (**Fig. 1 D and S2 D**). It was previously reported that the hHVEM H86I  
145 mutation dramatically reduced binding to hLIGHT (Shrestha et al., 2020).

146 Human HVEM CRD2 forms four additional polar contacts with GH loop of hLIGHT  
147 (**Fig. 1 E and S2 D**). The hHVEM Q97 side chain oxygen forms a polar contact with  
148 hLIGHT R228 side chain. Human HVEM M98 backbone amide group contacts the  
149 backbone oxygen of hLIGHT R228 and the side chain carboxyl group of hHVEM D100  
150 forms two polar contacts with the side-chain guanidinium group of hLIGHT R226 (**Fig. 1**  
151 **E and S2 D**). The hHVEM D100R mutation resulted in undetectable binding with hLIGHT  
152 (Shrestha et al., 2020). The AA' loop from the lower region of CRD2 contributes only a  
153 single polar contact, formed by the main chain oxygen from G100 of hLIGHT and the side  
154 chain amide group of hHVEM Q95 (**Fig. 1 E and S2 D**).

155 hHVEM CRD3 residues, including I128-G132, H134 and A136-R139 participate in  
156 interactions with G151-V152 and A159-T161 from the CD loop, as well as residues Q183,  
157 R195-V196 and W198 from the EF loop of hLIGHT (**Fig. S2, C and D**). Examination of the  
158 structure in this region reveals no polar contacts between hHVEM and hLIGHT. A modest  
159 hydrophobic interface is formed by the packing of the side chains of hHVEM residues I128  
160 and V129 against the side chains of hLIGHT V152 and V196 (**Fig. 1 F and S2 D**).

161

### 162 ***Structure of the human HVEM:LIGHT:CD160 ternary complex***

163 It was previously shown that LIGHT and the IgSF ligands do not compete for  
164 binding to HVEM (Cai et al., 2008; Liu et al., 2019), suggesting the potential for forming a  
165 ternary complex. Therefore, we set out to solve the crystal structure of  
166 hHVEM:hLIGHT:hCD160 (human CD160 is denoted as hCD160) complex (PDB entry  
167 7MSG). Accordingly, we determined the structure of this complex to 3.5 Å resolution by  
168 molecular replacement using CD160 (PDB entry 6NG9) and the hHVEM:hLIGHT complex  
169 described above (PDB entry 4RSU) as search models (**Fig. 2, A and B**). The asymmetric

170 unit contains three copies of each hHVEM, hLIGHT and hCD160, forming a ternary  
171 complex with 3:3:3 stoichiometry. Within the ternary assembly, hHVEM and hLIGHT  
172 exhibit the classical 3:3 TNF:TNFR assembly, with contacts that are very similar to the  
173 structure of the hHVEM:hLIGHT binary complex described above. The hHVEM:hLIGHT  
174 complex forms the core of the ternary complex with each hHVEM CRD1 further binding a  
175 single molecules of hCD160 in a manner similar to that observed in the structure of the  
176 hHVEM:hCD160 binary complex (**Fig. 2, A and D and Fig. S3 C**). Notably, the structures  
177 of hHVEM:hLIGHT:hCD160 and hHVEM:hCD160 complexes relied on the use of a single  
178 chain hCD160-hHVEM fusion protein as the relatively weak interaction of hCD160-hHVEM  
179 ( $7.1 \pm 0.9 \mu\text{M}$ ) does not support the stable complex formation in solution (Liu et al., 2019).  
180 The crystal structure of the hHVEM:hLIGHT:hCD160 complex provides direct evidence  
181 that hLIGHT and hCD160 can simultaneously engage hHVEM, resulting in a higher order  
182 assembly with the potential of coordinated signaling through both hHVEM and hCD160.  
183 Notably, the simultaneous interaction of hCD160 and hLIGHT with hHVEM alters the local  
184 organization of hCD160, as engagement of hHVEM with trimeric hLIGHT may enforce  
185 close proximity of up to three hCD160 molecules with distinct geometric organization, as  
186 compared to the engagement of hCD160 and hHVEM in the absence of hLIGHT.

187         Crystal structures and complementary mutagenesis studies of hHVEM:hCD160  
188 and hHVEM:hBTLA (human BTLA is denoted as hBTLA) complexes demonstrated that  
189 both hCD160 and hBTLA mainly bind to CRD1 on hHVEM (**Fig. 2, C and D**) (Compaan  
190 et al., 2005; Liu et al., 2019). In contrast, the crystal structure of the hHVEM:hLIGHT  
191 complex shows hLIGHT binds to CRD2, CRD3 and a small part of CRD1 on hHVEM (**Fig.**  
192 **2 E**). Crystal structures of hHVEM in complex with hBTLA and hCD160 highlight an anti-  
193 parallel intermolecular  $\beta$ -strand interaction, in which the  $\beta$ -strand composed of residues  
194 G72-P77 from CRD1 in hHVEM contacts the edge  $\beta$ -strands in hBTLA and hCD160



195 through canonical main-chain-to-main-chain  $\beta$ -sheet hydrogen bonds (**Fig. 2, F and G**).  
196 This pattern of hCD160 interactions with hHVEM is conserved in the ternary  
197 hHVEM:hLIGHT:hCD160 complex. Mutations of residues within this intermolecular  
198  $\beta$ -strand (G72-P77) in HVEM CRD1 significantly altered the binding affinities (Shrestha  
199 et al., 2020), while hHVEM CRD2 mutations do not significantly alter the affinities to  
200 hCD160 and hBTLA. In contrast, HVEM CRD2 mutations, particularly the HVEM residues  
201 forming the concave cavity surrounding hLIGHT Y173, significantly affect hHVEM:hLIGHT  
202 binding (**Fig. 2 H**). Because both hCD160 and hBTLA bind to similar epitopes on hHVEM  
203 CRD1 (Compaan et al., 2005; Liu et al., 2019), it is likely that hHVEM, hLIGHT and hBTLA  
204 are able to form a ternary complex similar to the trimolecular complex of  
205 hHVEM:hLIGHT:hCD160 we have determined.

206

### 207 ***Structure guided mutagenesis of mouse HVEM mutants***

208 The mHVEM (mouse HVEM is denoted as mHVEM, PDB entry 7MSJ) structure  
209 was determined to 2.10 Å resolution by molecular replacement using the human HVEM  
210 (PDB entry 4FHQ) as the search model. The mouse and human HVEM structures are  
211 similar with RMSD of 2.7 Å for 97 aligned  $C_{\alpha}$  atoms, with the biggest differences in CRD3  
212 (**Fig. 3, A and B**). Based on structural and sequence alignments between hHVEM and  
213 mHVEM, the solvent accessible mHVEM residues close to the putative binding interfaces  
214 were mutated to dissect the interaction network and enable in vivo HVEM functional  
215 studies.

216 The relative binding affinities of mHVEM mutants with mBTLA and mLIGHT  
217 (mouse BTAL and LIGHT are denoted as mBTLA and mLIGHT, respectively) were  
218 evaluated by a cell-cell interaction assay (**Fig. 3 C**). The relative binding affinities of  
219 mHVEM mutants for mCD160 (mouse CD160 is denoted as mCD160) binding were

220 screened using a cell-soluble protein assay because of low surface expression of the  
221 CD160 protein. A total of 52 mHVEM surface residues within or close to the likely ligand  
222 binding interfaces were individually mutated to different amino acids to probe the effect on  
223 ligand binding and to identify variants with selective ligand recognition (**Fig. 3 D**). For  
224 example, alteration of mHVEM G72 or V74 to aspartic acid attenuated binding to both  
225 mBTLA and mCD160, but not binding to mLIGHT; the mHVEM R43D, M56D or A76D  
226 mutations decreased binding to mCD160 but not mBTLA and mLIGHT; the mHVEM H86D,  
227 L90A, L94A and L94D mutations compromised the interaction with mLIGHT but not to  
228 mBTLA or mCD160 (**Fig. 3 D and S3 E**).

229 To further modulate the selectivity toward mLIGHT or mBTLA/mCD160, mHVEM  
230 mutations with similar binding properties were combined (**Fig. 4 A and S3 F**). For example,  
231 the combination of the G72 and V74 mutations completely eliminated binding to both  
232 mBTLA and mCD160, but did not appreciably impact mLIGHT binding in the flow  
233 cytometry based binding assays. Various pairwise combinations of mutations of H86, L90  
234 and L94 eliminated mLIGHT binding, but did not substantially impact binding to mBTLA or  
235 mCD160 (**Fig. 4 A and S3 F-G**). Thus, these compound mutations resulted in several  
236 additional mHVEM variants with considerable binding selectivity. Although triple mutation  
237 of H86, L90 and L94 removed mLIGHT binding, it also dramatically reduced binding to  
238 mBTLA and mCD160 (**Fig. S3 F**). Not surprisingly, other combinations of mutations also  
239 reduced the binding to all ligands, such as the mHVEM R43D-M56A-K64D triple mutation  
240 (**Fig. S3 F**).

241 Residues G72 and V74 contribute to the binding interface of the hHVEM:hCD160  
242 and hHVEM:hBTLA complexes (**Fig. 2, F-G and 4 B**), whereas H86 and L90 residues are  
243 within the hHVEM:hLIGHT interface in close proximity to hLIGHT Y173, based on the  
244 hHVEM:hLIGHT structure (**Fig. 2 H and 4 B**). The mHVEM G72R-V74A double mutation  
245 exhibited no binding to mBTLA or mCD160, while it retained wild-type binding to mLIGHT

246 in our cell-cell and cell-protein interaction system (**Fig. 4 A and S3, F-G**). This mHVEM  
247 mutant was selected for further analysis and is designated as mHVEM<sup>-BT/160</sup>, denoting loss  
248 of BTLA and CD160 binding. The mHVEM H86D-L90A double mutation showed no  
249 binding to mLIGHT and wild-type binding to mBTLA and mCD160 (**Fig. 4 A and S3, F-G**).  
250 This mHVEM H86D-L90A mutant is thus designated as mHVEM<sup>-LIGHT</sup>, denoting loss of  
251 LIGHT binding. Both mHVEM<sup>-BT/160</sup> and mHVEM<sup>-LIGHT</sup> proteins were expressed in soluble  
252 form and their ligand binding was measured by surface plasmon resonance. The mHVEM<sup>-</sup>  
253 <sup>BT/160</sup> eliminated binding to both mBTLA/mCD160 while it still retained close to wild-type  
254 binding to mLIGHT (**Fig. 4 C**). The mHVEM<sup>-LIGHT</sup> had approximately 5-fold and 3-fold  
255 reduced binding to mBTLA and mCD160, respectively, but had more than a three log-fold  
256 decrease in binding to mLIGHT (**Fig. 4 C**).

257

#### 258 ***mHVEM<sup>-LIGHT</sup> mice are more susceptible to Yersinia infection***

259 We tested the role of the mouse HVEM muteins, mHVEM<sup>-BT/160</sup> (G72R-V74A) and  
260 mHVEM<sup>-LIGHT</sup> (H86D-L90A) *in vivo*. We used the CRISPR/Cas9 system to generate two  
261 knockin (KI) mouse strains (**Fig. S4 A**). KI homozygous mice having either HVEM mutein  
262 were born at the expected frequency with normal size and maturation. Immune cells from  
263 homozygous KI mice from either strain expressed a normal surface level of HVEM in  
264 different cell types, including splenic CD4<sup>+</sup> T cells, invariant nature killer T (iNKT) cells,  
265 and innate lymphoid cells (ILCs) (**Fig. S4 B**).

266 Previously, using conditional HVEM knockouts, we reported that HVEM signals in  
267 ILC3 are critical for host defense against oral infection with *Yersinia enterocolitica* (*Y.*  
268 *enterocolitica*) (Seo et al., 2018). Importantly, the evidence from whole body LIGHT-  
269 deficient mice suggested that this HVEM-mediated protection was dependent on LIGHT,  
270 not on BTLA or CD160. These data did not exclude a contribution by other aspects of this  
271 network. For example, LTβR deficient mice were not tested and LIGHT-LTβR interactions

272 are also eliminated when the gene encoding LIGHT is deleted. To test the *in vivo* function  
273 of the HVEM muteins, mHVEM<sup>BT/160</sup> and mHVEM<sup>LIGHT</sup> mice were orally infected with *Y.*  
274 *enterocolitica*. Homozygous mHVEM<sup>LIGHT</sup> (KI/KI) mice displayed lower survival, more  
275 pronounced weight loss, and large areas of necrosis in the liver and spleen compared with  
276 control WT mice (**Fig. 5, A-C**). This severe disease outcome is similar to that observed in  
277 *Light* knockout mice (Seo et al., 2018), indicating LIGHT-LTβR interactions do not  
278 contribute to resistance or cannot overcome the effect of loss of LIGHT binding to HVEM  
279 expressed by ILC3. Interestingly, heterozygous mHVEM<sup>LIGHT</sup> (KI/+) mice had an  
280 intermediate phenotype, with weight loss similar to homozygous mHVEM<sup>LIGHT</sup> mice, but  
281 they showed better survival than mHVEM<sup>LIGHT</sup> mice, as well as reduced necrotic areas  
282 and decreased bacterial foci in spleen and liver. Considering that LIGHT binding induces  
283 a trimerization of HVEM that likely enhances signaling, an intermediate phenotype might  
284 be expected in KI/+ heterozygous mice that would form fewer WT (wild-type) HVEM  
285 trimers. In a separate group of *Y. enterocolitica* infections carried out with mHVEM<sup>BT/160</sup>  
286 mice, animals homozygous for a gene encoding the HVEM mutein that does not bind  
287 either IgSF ligand responded similarly to WT mice (**Fig. 5, D-F**). Because of normal  
288 experimental variability in bacterial cultures, there was increased weight loss and  
289 decreased survival in the WT mice in the series of experiments with mHVEM<sup>BT/160</sup> mice  
290 (**Fig. 5, D-F**) compared to WT controls in experiments with mHVEM<sup>LIGHT</sup> mice (**Fig. 5, A-**  
291 **C**). The key comparison, however, is mHVEM mutein expressing to WT mice within an  
292 experiment, and only mHVEM<sup>LIGHT</sup> showed a difference. Also, note that clearance was  
293 greatly diminished at day 12 only in mHVEM<sup>LIGHT</sup> mice and the recovery from weight loss  
294 was complete at the end of the experiment in surviving mHVEM<sup>BT/160</sup> mice, similar to the  
295 WT controls. Therefore, our data suggest that indeed LIGHT is the unique ligand for HVEM

296 in protection from *Y. enterocolitica* and that LIGHT binding to the LT $\beta$ R is not relevant in  
297 this context.

298

### 299 **mHVEM<sup>-BT/160</sup> mice are more susceptible to hepatic inflammation**

300 Previous studies have reported that *Btla*<sup>-/-</sup> or *Cd160*<sup>-/-</sup> mice are more susceptible to  
301 hepatic injury induced by Concanavalin A (ConA) or by the synthetic glycosphingolipid  
302 alpha-galactosylceramide ( $\alpha$ GalCer) (Iwata et al., 2010; Kim et al., 2019; Miller et al.,  
303 2009). We focused on  $\alpha$ GalCer because of its well-defined mechanism of action as a  
304 specific activator of iNKT cells, which are very abundant in intrahepatic lymphocyte  
305 populations. When mice are injected with  $\alpha$ GalCer, iNKT cells are rapidly stimulated and  
306 produced many types of pro-inflammatory cytokines, including TNF, IFN $\gamma$ , and IL-4, driving  
307 liver injury (Biburger and Tiegs, 2005; Wang et al., 2013). Furthermore, both BTLA and  
308 CD160 are expressed by iNKT cells and both molecules served to attenuate production  
309 of inflammatory cytokines by iNKT cells during  $\alpha$ GalCer-induced acute hepatitis (Kim et  
310 al., 2019; Miller et al., 2009), providing an example in which two HVEM binding IgSF  
311 molecules are required in one cell type. The function of LIGHT in this model has not been  
312 reported.

313  $\alpha$ GalCer was injected into female mHVEM<sup>-LIGHT</sup> and mHVEM<sup>-BT/160</sup> mice and  
314 controls. mHVEM<sup>-LIGHT</sup> mice presented with a similar phenotype to controls, which at this  
315 dose induced only limited  $\alpha$ GalCer-triggered liver damage and serum ALT activity (**Fig. 6,**  
316 **A-C**). By contrast, larger white spots on the surface of liver and massive hepatic necrotic  
317 regions developed in mHVEM<sup>-BT/160</sup> mice (**Fig. 6, A and B**). Consistently, serum alanine  
318 aminotransferase (ALT) activity was elevated in mHVEM<sup>-BT/160</sup> mice compared with  
319 littermate control or heterozygous (KI/+) mice (**Fig. 6 D**). Heterozygous mHVEM<sup>-BT/160</sup> mice  
320 showed an intermediate phenotype, particularly with regard to the ALT measurement.

321 Considering that the IgSF ligand-HVEM interaction is monomeric, this phenotype could  
322 reflect HVEM gene haploinsufficiency. These findings suggest that HVEM:BTLA and/or  
323 HVEM:CD160 engagement generated negative signaling in iNKT cells, thereby preventing  
324 severe  $\alpha$ GalCer-induced liver injury and hepatitis.  
325

## 326 Discussion

327 HVEM and its ligands constitute an interacting network of cell surface proteins that  
328 affect many aspects of lymphocyte function, as well as the responses of numerous other  
329 cells types including eosinophils, keratinocytes, epithelial cells and macrophages in the  
330 brain (Doherty et al., 2011; Herro et al., 2018; Shui et al., 2012; Zhu et al., 2016). In order  
331 to understand how HVEM functions *in vivo* in this network, and to develop therapeutics  
332 based on its mechanisms of action, one important tool is new mouse strains including  
333 those that delete HVEM expression in certain cell types (Mintz et al., 2019; Seo et al.,  
334 2018), mutants that separate HVEM ligand function from HVEM signaling, and expression  
335 of HVEM mutants with selective binding to only certain ligands. Here we report the  
336 structures of human orthologs of members this network, including the ternary  
337 hHVEM:hLIGHT:hCD160 and binary hHVEM:hLIGHT complexes; we also report the  
338 structure of mHVEM in isolation. These structures guided mutagenesis studies that  
339 identified HVEM muteins with selective ligand binding. Additionally, we have tested these  
340 HVEM muteins *in vivo* in mouse strains. In this way, without eliminating expression of any  
341 member of the network, we provide data indicating that that selective HVEM-ligand  
342 interactions are responsible for host defense from enteric bacterial infection and for the  
343 prevention of liver inflammation.

344 In contrast to the homotrimeric structure of LIGHT, BTLA and CD160 proteins are  
345 monomers (Compaan et al., 2005; Zhu et al., 2016). Crystallographic and biochemical  
346 studies illustrated that hHVEM:hBTLA and hHVEM:hCD160 complexes are characterized  
347 by a 1:1 stoichiometry (**Fig. 2, C-D**) (Compaan et al., 2005). Unlike trimeric LIGHT, which  
348 directly drives formation of assemblies containing multiple HVEM molecules, monomeric  
349 BTLA and CD160 may activate HVEM receptor to promote NF- $\kappa$ B signaling and cell  
350 survival (Cheung et al., 2009a; Cheung et al., 2009b) through other mechanisms. The  
351 membrane-anchored forms of BTLA and CD160 could drive the localized enrichment of

352 HVEM at cell-cell interfaces, and as a consequence enhance the local concentration of  
353 HVEM cytoplasmic domains and associated signaling molecules. Additionally, soluble  
354 trimeric LIGHT could contribute by driving the formation of assemblies that bring up to  
355 three molecules of HVEM into close proximity, which may facilitate increased local density  
356 of HVEM:BTLA and HVEM:CD160 complexes. The recognition interfaces in the ternary  
357 hHVEM:hLIGHT:hCD160 complex are similar to those in the binary hHVEM:hCD160 and  
358 hHVEM:hLIGHT complexes, suggesting that little molecular accommodation is required  
359 for HVEM to simultaneously engage two types of binding partners. It remains to be  
360 determined under which conditions HVEM concurrently binds LIGHT and one of its IgSF  
361 ligands, if a trimeric HVEM:LIGHT complex can contain mixed IgSF binding partners, both  
362 CD160 and BTLA, and importantly, whether these interactions enhance BTLA- or CD160-  
363 mediated signals. Furthermore, LIGHT can be expressed in membrane bound or soluble  
364 forms, and it is not known if the membrane-bound form also can bind HVEM  
365 simultaneously with BTLA or CD160. Previously, it was suggested that when LIGHT and  
366 BTLA are presented on the same cell membrane, membrane LIGHT might limit BTLA  
367 binding in trans due to steric incompatibilities associated with the position of the LIGHT  
368 and IgSF binding sites on HVEM relative to the cell membrane (Steinberg et al., 2011). In  
369 humans, the stalk region of LIGHT is 35 amino acids, while for BTLA it is only 24 amino  
370 acids. For hCD160, it is 17 amino acids for the glycosylphosphatidylinositol (GPI)-linked  
371 form and 19 amino acids for the transmembrane form. These constraints would position  
372 BTLA and CD160 too close to the cell membrane to bind HVEM together with LIGHT (**Fig.**  
373 **S5**). Therefore, it is possible that the membrane bound and secreted forms of LIGHT could  
374 have different impacts on HVEM:BTLA and HVEM:CD160 binding, based on their position  
375 relative to the cell membrane, but additional *in vitro* and *in vivo* studies will be required to  
376 verify this.



377 Whole body and cell-type-specific gene knock outs have provided important  
378 insights into the function of HVEM and its binding partners (Mintz et al., 2019; Seo et al.,  
379 2018). Elimination of expression of one member of this network, however, could have  
380 complex effects on others. For example, deletion of LIGHT not only eliminates LIGHT-  
381 HVEM interaction, but also the LIGHT-LT $\beta$ R interaction. It is also possible that LIGHT  
382 deletion might provide more LT $\beta$ R available for binding to LT $\alpha\beta_2$ , and in humans, blockade  
383 of LIGHT may alter the degree of inhibition of TL1A and FasL by DcR3, a decoy receptor  
384 not present in mice. Although analysis of no single mutation can discriminate between all  
385 these possibilities, we set out to test the importance *in vivo* of pairwise interactions in the  
386 HVEM network in a context in which expression of all of the proteins was maintained. To  
387 do this, we mutated solvent accessible amino acids in mHVEM that are close to the ligand  
388 binding interfaces defined by structural analyses. We succeeded in identifying mHVEM  
389 mutants with selective binding *in vitro* for either LIGHT or for the two IgSF ligands. These  
390 HVEM proteins were expressed at normal amounts on cells in genetically altered mouse  
391 strains and were tested *in vivo* following oral infection with *Y. enterocolitica* and following  
392 injection with  $\alpha$ GalCer to activate iNKT cells to cause liver inflammation. These data  
393 demonstrate a high degree of ligand selectivity in this more complete network. Our data  
394 show that LIGHT-HVEM interactions are required for host defense against *Y.*  
395 *enterocolitica*. In mice that retain normal expression of LIGHT and HVEM, but in which  
396 only the ability of these proteins to interact was greatly diminished, bacteria spread and  
397 weight loss were increased and survival was diminished. The phenotype was similar to  
398 mice deficient for HVEM in T cells and ILC3, or in whole body knockout mice lacking  
399 LIGHT expression. There was no effect on the host response in mice in which HVEM  
400 binding to CD160 and BTLA was diminished. Similarly, liver inflammation was dependent  
401 on CD160 and/or BTLA interacting with HVEM. As suggested by other studies (Iwata et

402 al., 2010; Kim et al., 2019; Miller et al., 2009), this behavior may be due to the loss of  
403 inhibitory signaling in the iNKT cells that initiate this inflammatory response. It was not  
404 greatly dependent on LIGHT binding to HVEM, suggesting LIGHT induced HVEM  
405 trimerization is not a major factor in promoting or inhibiting BTLA and CD160 signaling in  
406 this system.

407         It is not known why individual HVEM ligands are important for mediating biologic  
408 effects in particular contexts, and how the great difference in binding affinity between  
409 LIGHT and the IgSF binding partners contribute to these processes. All of the ligands  
410 activate NF- $\kappa$ B proteins (Cheung et al., 2009b), and there is no evidence that they employ  
411 different mechanisms for signaling through HVEM. Tissue context is likely critical in some  
412 cases. For example, it is not surprising that intestine epithelial HVEM interacts mainly with  
413 CD160 expressed by intraepithelial lymphocytes (IEL), because these cells are in  
414 continual contact with the epithelium (Shui et al., 2012), and CD160 is the only HVEM  
415 binding partner IEL highly express. Reverse signaling by HVEM through either CD160 or  
416 BTLA could drive the biology in other instances, as reported recently for the germinal  
417 center response (Mintz et al., 2019) or in the liver inflammation model (Iwata et al., 2010;  
418 Kim et al., 2019; Miller et al., 2009). Ultimately, a deeper understanding of the biologic  
419 effects of HVEM may permit the safer use of muteins and other reagents in a therapeutic  
420 context; for example, in cancer immunotherapy, where soluble HVEM has shown benefit  
421 in a mouse model of lymphoma (Pasero and Olive, 2013; Sedy and Ramezani-Rad, 2019)  
422 or for treating inflammatory diseases.

423

424 **Materials and methods**

425 ***Molecular Cloning and Mutagenesis***

426 A portion of the hHVEM gene encoding residues L39-C162 and mHVEM encoding  
427 residues Q39-T142 were amplified by PCR and the resulting DNA fragments were  
428 digested with endonucleases BglII and AgeI and ligated into plasmid pMT/BiP/V5-His for  
429 His-tag fusion protein production in *Drosophila* S2 cells. DNA fragment encoding the  
430 amino acid sequence “HHHHHHG” fused to hLIGHT (L83-V240) was cloned into  
431 pMT/BiP/V5-His. The mCD160 gene encoding residues 30I-154H with the C-terminus  
432 fused with amino acids “HHHHHHGGGGSGSLNDIFEAQKIEWHE” was cloned into pET3a.  
433 The DNA sequences encoding a protein biologic composed of mHVEM residues (Q39-  
434 Q206) followed by human IgG1 and a subsequent hexa-His tag sequences were cloned  
435 into pcDNA 3.3 vector (Life technologies) using In-fusion HD cloning enzyme premix  
436 (Clontech). DNA fragment encoding the amino acid sequence “HHHHHHGG” fused to the  
437 N-terminus of the single chain homotrimeric mLIGHT extracellular domain (G73-V239)  
438 connecting by two (GGGGS)<sub>4</sub> linkers was cloned into pcDNA 3.3 vector (Life  
439 technologies).

440 A DNA fragment encoding residues of L39-V202 of hHVEM was cloned into an  
441 engineered pGFP-N1 vector (Clontech) for expression as a protein fused with a PD-L1  
442 trans-membrane domain followed by the fluorophore eGFP at the C-terminus. The hHVEM  
443 mutant library was generated using the QuickChange II Site-Directed Mutagenesis Kit  
444 (Agilent Technologies). Full length of WT mHVEM and mutants were cloned into  
445 pmCherry-N1 vector (Clontech), respectively. Full length of mBTLA was cloned into  
446 pEGFP-N1 vector (Clontech). Full length of mLIGHT was cloned into pIRES2-EGFP  
447 vector (Clontech), which contains a subsequent IRES (Internal Ribosome Entry Site)  
448 sequence following by a fluorescent EGFP ORF.

449

## 450 **Protein Production and Purification**

451 All hHVEM, hLIGHT and mHVEM proteins were expressed and purified as  
452 previously described (Liu et al., 2015). The extracellular domains of hHVEM (L39-C162),  
453 hLIGHT (L83-V240) and mHVEM (Q39-T142) were separately cloned into the  
454 pMT/BiP/V5-His A vector (Invitrogen) and co-transfected into *Drosophila* S2 cells with the  
455 pCoBlast (Invitrogen) plasmid at a 20:1 ratio. A stable cell line was selected with Blasticidin  
456 following the manufacture's protocol (Invitrogen). All hHVEM, hLIGHT and mHVEM  
457 expression were induced with copper sulfate (500  $\mu$ M final concentration). The proteins  
458 from filtered culture supernatants were purified by Ni-NTA column (QIAGEN) and size  
459 exclusion chromatography (HiLoad Superdex 75; Amersham). The single chain hCD160-  
460 hHVEM fusion protein was expressed in *Drosophila* S2 cells and purified to homogeneity  
461 as previously described (Liu et al., 2019). The mCD160 protein was purified as inclusion  
462 bodies and refolded as previously described (Liu et al., 2019). The expression vectors  
463 encoding mHVEM (Q39-Q206) fused with human IgG1 and a subsequent hexa-His tag  
464 sequences were transfected into Expi293 (Gibco) cells using ExpiFectamine 293  
465 transfection kit (Gibco) and the resulting proteins were purified using Ni-resins (Qiagen).  
466 The vector encoding a hexa-His tag fused to a single chain homotrimeric mLIGHT  
467 extracellular domain (G73-V239) connecting by two (GGGGS)<sub>4</sub> linkers was transfected  
468 into Expi293 (Gibco) cells using the ExpiFectamine 293 transfection kit (Gibco) and the  
469 resulting proteins were purified using Ni-resins (Qiagen) and size exclusion  
470 chromatography (HiLoad Superdex 75; Amersham). The resulting purified mLIGHT  
471 proteins were used freshly.

472

## 473 **Cell culture**

474 Transformed *E. coli* cells were cultured in LB (Lysogeny Broth) medium  
475 supplemented with 100 mg/L Carbenicillin at 37 °C. Transfected *Drosophila* S2 cells were

476 cultured in complete Schneider's *Drosophila* medium (Life Technologies) supplemented  
477 with 10% heat-inactivated fetal bovine serum in the presence of 25 mg/L Blasticidin for  
478 establishing stable cell lines. Protein expression in *Drosophila* S2 cell lines was induced  
479 in Express Five SFM medium (Life Technologies) in the presence of 500mM CuSO<sub>4</sub> at 25  
480 °C. Expi293 cells were maintained in DMEM (Corning) with 10% FBS at 37 °C with 5%  
481 CO<sub>2</sub>. The transfected Expi293 cells were cultured at 37 °C with 5% CO<sub>2</sub> for flow cytometry  
482 analysis or at 30 °C with 5% CO<sub>2</sub> for protein expression.

483

#### 484 ***Crystallization, Structure Determination and Refinement***

485 The purified hHVEM and hLIGHT proteins were concentrated separately and mixed  
486 in a 1:1 molar ratio to generate the hHVEM:hLIGHT complex, at a concentration of 3  
487 mg/mL in 10 mM HEPES, pH 7.0 and 150 mM NaCl solution. The resulting  
488 hHVEM:hLIGHT complex was crystallized by sitting drop vapor diffusion using 0.5 μL of  
489 protein and 0.5 μL of precipitant composed of 0.1 M Bis-Tris, pH5.5, 0.2 M MgCl<sub>2</sub> and 9%  
490 PEG3350. Crystals were cryo-protected by immersion in crystallization buffer  
491 supplemented with 20% of glycerol, and flash-cooled in liquid nitrogen. The purified single  
492 chain hCD160-hHVEM proteins and hLIGHT were concentrated separately and mixed in  
493 a 1:1 molar ratio to generate the hHVEM:hLIGHT:hCD160 complex at a concentration of  
494 5 mg/mL in 10 mM HEPES, pH 7.0 and 150 mM NaCl solution. The resulting  
495 hHVEM:hLIGHT:hCD160 complex was crystallized by sitting drop vapor diffusion using  
496 0.5 μL of protein and 0.5 μL of precipitant composed of 12% (W/V) PEG3350 and 4%  
497 (V/V) tacsimate. Crystals were cryo-protected by immersion in crystallization buffer  
498 supplemented with 20% ethylene glycerol, and flash-cooled in liquid nitrogen. The purified  
499 mHVEM was concentrated to 3 mg/mL in 10 mM HEPES, pH 7.0 and 150 mM NaCl  
500 solution and then crystallized by sitting drop vapor diffusion using 0.5 μL of protein and

501 0.5  $\mu$ L of precipitant composed of 90% (V/V) solution A with 0.2 M lithium sulfate, 0.1 M  
502 sodium acetate/acetic acid, pH4.5, 30% (W/V) PEG 8000 and 10% (V/V) solution B with  
503 NDSB-211. Crystals were cryo-protected by immersion in crystallization buffer  
504 supplemented with 40% of glycerol, and flash-cooled in liquid nitrogen.

505 Diffraction data from the hHVEM:hLIGHT complex were collected at Brookhaven  
506 National Laboratory (BNL) beamline X29 (**Table 1**). Diffraction data from  
507 hHVEM:hLIGHT:hCD160 complex and mHVEM were collected at Advanced Photon  
508 Source Sector 31, Argonne National Laboratory (**Table 1**). All diffraction data were  
509 integrated and scaled with HKL2000 (Otwinowski and Minor, 1997). Phases of the  
510 hHVEM:hLIGHT complex were calculated by molecular replacement using the existing  
511 PDB structures 4KG8 and 4FHQ as the starting models and the software Molrep in the  
512 CCP4 package (Winn et al., 2011). Phases of hHVEM:hLIGHT:hCD160 complex were  
513 calculated by molecular replacement using the existing PDB structure 6NG9 and  
514 hHVEM:hLIGHT complex (PDB entry 4RSU) as the starting models and the software  
515 Molrep in the CCP4 package (Winn et al., 2011). Phases of mHVEM were calculated by  
516 molecular replacement using the existing PDB structure 4FHQ as the starting model and  
517 the software Molrep in the CCP4 package (Winn et al., 2011). Electron density maps were  
518 manually inspected and improved using COOT (Emsley et al., 2010). Following several  
519 cycles of manual building in COOT and refinement in REFMAC5, the hHVEM:hLIGHT  
520 complex  $R_{\text{work}}$  and  $R_{\text{free}}$  converged to 18.4% and 22.6%, respectively (Emsley et al., 2010;  
521 Winn et al., 2011).

522

### 523 ***Mutagenesis screening by flow cytometry binding assays***

524 500 ng wild type and mutants of hHVEM-GFP fusion plasmids in 50  $\mu$ L PBS were  
525 mixed with 50  $\mu$ L of 0.04 M polyethylenimine (PEI), respectively. The mixtures were kept

526 still for 10 min and then added separately to a 24-well plate with each well containing 1mL  
527 of  $10^6$ /mL HEK293-Freestyle cells (Invitrogen). The transfected cells were cultured by  
528 shaking at a speed of 200 rpm at 37 °C for 72 h followed the transfection, and then the  
529 cells were collected and resuspended in PBS. Cells from each well were further diluted to  
530  $10^6$  cells/mL.

531 100  $\mu$ L of the diluted transfected cells were incubated separately with hCD160-  
532 6 $\times$ His tag, hBTLA-6 $\times$ His tag (R&D systems) and hLIGHT-6 $\times$ His tag proteins (made by the  
533 methods described above) in the mixtures with anti-6 $\times$ His tag PE-labeled antibody  
534 (Abcam) for 20 min on ice. The cells were subsequently spun down, washed once and  
535 resuspended in 100  $\mu$ L PBS buffer containing additional 0.5% BSA and then subjected to  
536 flow cytometric analysis. The cells were gated on GFP positive cells to ensure hHVEM  
537 expression and analyzed for the percentage of PE positive cells. The binding of wild-type  
538 hHVEM was normalized as 1. The relative binding of hHVEM mutants were calculated by  
539 comparing the PE positive cell percentage to the control wild-type hHVEM groups. The  
540 error bars reflect the results of three independent experiments.

541 The mHVEM, mBTLA and mLIGHT constructs were transfected into HEK293  
542 FreeStyle (Life technologies) cells using PEI (Linear Polyethylenimine with molecular  
543 weight of 25000; Polysciences Inc.). After 2~3 days, the cells were harvested and diluted  
544 to  $10^6$ /mL. For measuring cell-cell interactions, 100  $\mu$ L of cells expressing mHVEM-  
545 mCherry proteins were mixed with 100  $\mu$ L of cells expressing mBTLA-EGFP or mLIGHT-  
546 IRES-EGFP proteins and then subjected to shaking (900 RPM) at room temperature for 2  
547 h. These cells were further recorded and analyzed by flow cytometry. For protein staining,  
548 100  $\mu$ L of cells expressing mHVEM-mCherry proteins were mixed with 0.3  $\mu$ g mBTLA-  
549 penta-His-tag/mCD160-biotin proteins and 0.5  $\mu$ g of green fluorescent anti-His-tag  
550 (Abcam; Cat: ab1206)/Alexa Fluor 488 conjugated streptavidin (Life technologies; Cat:

551 S11223) proteins. The cells were incubated for 30 min with shaking at room temperature  
552 and washed once by PBS containing 0.2% BSA (PBS-BSA). The cells were re-suspended  
553 in 100  $\mu$ L of PBS-BSA and analyzed by flow cytometry.

554

555 ***Measuring affinities of mHVEM muteins using Octet bio-layer interometry (BLI)***  
556 ***technology***

557 For measuring binding affinities, mHVEM-hIgG1 was immobilized on the sensors  
558 (ForteBio) and then challenged with different concentrations of mLIGHT, mBTLA or  
559 mCD160. The results were exported and then analyzed using Prism 5 (GraphPad  
560 Software). Final response curves were generated after subtracting the responses of the  
561 control groups. The equilibrium dissociation constants ( $K_D$ ) of the mHVEM-hIgG1  
562 interaction with mLIGHT were calculated based on the response curves by fitting the data  
563 to the equation  $Y=B_{max} X / (X + K_D)$  ( $Y$  is the averaged maximum response of each  
564 experiments.  $X$  is the concentration of the analytes and  $B_{max}$  is the maximum specific  
565 binding. The equilibrium dissociation constants ( $K_D$ ) of mHVEM-hIgG1 interaction with  
566 mBTLA or mCD160 were calculated based on the 1:1 Langmuir model.

567

568 ***Generation of mHVEM mutant mice***

569 The mHVEM mutant mice were generated using the CRISPR/Cas9 system. The  
570 transgenic mouse core of the UC San Diego Moores Cancer Center injected the sgRNA-  
571 Cas9 complex plus a specific single-stranded DNA (ssDNA) homology directed repair  
572 (HDR) template into C57BL/6 pronuclear embryos. All materials of the CRISPR/Cas9  
573 system were designed and ordered from Integrated DNA Technologies (IDT, Newark, NJ).  
574 Two specific sgRNAs targeted exon 3 of the *Tnfrsf14* locus, sgRNA-1 for *Tnfrsf14*<sup>G72R/V74A</sup>  
575 (mHVEM<sup>BT/160</sup>): 5'-CAGGTCTGCAGTGAGCATAC-3' and sgRNA-2 for *Tnfrsf14*<sup>H86D/L90A</sup>  
576 (mHVEM<sup>LIGHT</sup>): 5'-ACATATACCGCCCATGCAAA-3'. Two specific ssDNAs were used as



577 HDR templates, mHVEM<sup>-BT/160</sup>: 5'-  
578 TGGCTGCAGGTTACCATGTGAAGCAGGTCTGCAGTGAGCACACGCGTACAGCGTG  
579 TGCCCCCTGTCCCCACAGACATATACCGCCCATGCA-3' and mHVEM<sup>-LIGHT</sup>: 5'-  
580 CAGGCACAGTGTGTGCCCCCTGTCCCCACAGACATATACAGCGGACGCTAATGG  
581 CGCTAGCAAGTGTCTGCCCTGCGGAGTCTGTGATCCAGGTAGGA-3'. For screening,  
582 we created a new restriction enzyme site near the PAM sequence, which did not alter the  
583 amino acid sequence. A new Mlul or NheI site was thereby created in the knockin  
584 genomes of the mHVEM<sup>-BT/160</sup> or mHVEM<sup>-LIGHT</sup> mice, respectively. The F0 founder pups  
585 were screened for exon 3 of the *Tnfrsf14* locus by enzyme digestion and PCR using the  
586 primers Hvem-exon3-F1 (5'-GTACAGTGTTTCAGTTCAGGGATAG-3') and Hvem-exon3-  
587 R1 (5'-AGCAGGAAAGAACCTCTCATTAC-3'). The *Tnfrsf14* exon 3 sequences were  
588 cloned and sequenced from each line of founder mice that had undergone HDR repair.  
589 The successfully HDR repair F0 founders were first backcrossed to the WT C57BL/6  
590 strain. Germ-line transmission of each line of mHVEM mutant mice (N1) was verified by  
591 PCR and restriction enzyme digestion analysis. Testing for potential off-target genes,  
592 analyzed by the software from IDT, and homologous sequences were confirmed by PCR  
593 using a specific pair of primers on each gene and sequencing at the N1 generation. We  
594 examined six potential off-target genes from mHVEM<sup>-BT/160</sup> strain and four genes from  
595 mHVEM<sup>-LIGHT</sup> strain. Two and four founders from mHVEM<sup>-BT/160</sup> or mHVEM<sup>-LIGHT</sup> strain,  
596 respectively, were verified and backcrossed again to the WT C57BL/6 mice. After two  
597 backcrosses with C57BL/6 mice, we obtained heterozygous (KI/+) mice (N2) from each  
598 mHVEM mutant strain. We obtained homozygous offspring (N2F1) by intercrossing the  
599 N2 generation of KI/+ mice. Age and gender matched cohoused littermates were used for  
600 experiments. All mice were bred and housed under specific pathogen-free (SPF)  
601 conditions in the vivarium of La Jolla Institute for Immunology (LJI) and all animal  
602 experimental procedures were approved by the LJI Animal Care and Use Committee.

603

604 **Bacterial infection**

605 *Yersinia enterocolitica* strain WA-C (pYV::CM) was prepared as described  
606 previously (Seo et al., 2018; Trulzsch et al., 2004). Briefly, *Yersinia* were grown overnight  
607 in LB broth at 30°C, and the overnight culture was expanded with fresh medium for 6 h.  
608 Bacteria were washed and diluted with PBS. Co-housed male littermates were infected by  
609 oral gavage with  $1 \times 10^8$  c.f.u. of *Y. enterocolitica*. Infected mice were analyzed by  
610 measurement of body weight daily and tissues were harvested at 7 days after infection for  
611 determination of bacterial c.f.u. and histologic analysis as described previously (Seo et al.,  
612 2018).

613

614 **Hepatic inflammation**

615 Co-housed female littermates were inoculated with 2  $\mu$ g  $\alpha$ GalCer (KRN7000,  
616 Kyowa Kirin Research, La Jolla, California) in a total volume of 200  $\mu$ l PBS by retro-orbital  
617 injection. Serum ALT activity was measured using a colorimetric/fluorometric assay kit  
618 (K752, Biovision) at 16 or 24 h after injection. Hepatic tissues were collected and the  
619 necrotic areas were determined using H&E staining at 24 h after  $\alpha$ GalCer treatment.

620

621 **Statistics analysis**

622 All data were randomly collected and analyzed using Microsoft Office Excel and  
623 GraphPad Prism 8 software. Data were shown as mean with the standard error of the  
624 mean (s.e.m.). The detail of statistical analysis methods and the representing number of  
625 mice (n) is indicated in each figure legend. Statistical significance is indicated by \*  $P <$   
626 0.05; \*\* $P <$  0.01; \*\*\* $P <$  0.001.

627

628 **Online supplemental material**

629 Fig. S1 illustrates the network of interactions between HVEM and its binding partners. Fig.  
630 S2 shows the binding interface between hHVEM and hLIGHT. Fig. S3 shows the relative  
631 binding affinities of the HVEM mutants with BTLA, CD160, and LIGHT. Fig. S4 shows the  
632 outcome of CRISPR-Cas9 editing of exon 3 of the *Tnfrsf14* locus and also that mHVEM<sup>BT/160</sup>  
633 and mHVEM<sup>LIGHT</sup> mice have normal surface HVEM expression. Fig. S5 illustrates a  
634 model for the stalk regions of BTLA, CD160, and LIGHT. Table 1 shows data collection  
635 and refinement statistics of the crystal structures of the hHVEM:hLIGHT,  
636 hHVEM:hLIGHT:hCD160, and mHVEM complexes and proteins.

637

638 **Acknowledgments**

639 We thank the staff of X29A beam lines at the National Synchrotron Light Source. Use of  
640 the National Synchrotron Light Source, Brookhaven National Laboratory, was supported  
641 by the U.S. Department of Energy, Office of Science, Office of Basic Energy Sciences,  
642 under Contract No. DE-AC02-98CH10886. Data for parts of this study were collected at  
643 beamline X29A of the National Synchrotron Light Source. Financial support comes  
644 principally from the Offices of Biological and Environmental Research and of Basic Energy  
645 Sciences of the US Department of Energy, and from the National Center for Research  
646 Resources (P41RR012408) and the National Institute of General Medical Sciences  
647 (P41GM103473) of the National Institutes of Health. Use of the Advanced Photon Source,  
648 an Office of Science User Facility operated for the U.S. Department of Energy (DOE)  
649 Office of Science by Argonne National Laboratory, was supported by the U.S. DOE under  
650 Contract No. DE-AC02-06CH11357. Use of the Lilly Research Laboratories Collaborative  
651 Access Team (LRL-CAT) beamline at Sector 31 of the Advanced Photon Source was  
652 provided by Eli Lilly Company, which operates the facility. We also acknowledge support  
653 from the Albert Einstein Cancer Center (P30CA013330), the Einstein Crystallographic  
654 Core X-ray Diffraction Facility supported by NIH Shared Instrumentation Grant S10  
655 OD020068 and the Albert Einstein Macromolecular Therapeutics Development Facility.  
656 This work was partially supported by the Price Family Foundation and contributions to the  
657 Albert Einstein Center for Experimental Therapeutics by Pamela and Edward S. Pantzer.  
658 We thank Jun Zhao and Ella Kothari from transgenic mouse core of the UC San Diego  
659 Moores Cancer Center (supported by NIH grant P30CA023100), Zbigniew Mikulski,  
660 Angela Denn, and Katarzyna Dobaczewska from LJI Histology Core (supported by NIH  
661 grant P30 DK120515 from San Diego Digestive Diseases Research Center), Kristine  
662 Suchey, Mindy Hockaday and the staff from LJI animal facility (DLAC) and Cheryl Kim  
663 from LJI Flow Cytometry Core (supported by NIH grant S10RR027366).

664 Support for M.K. from NIH grants U01 AI125955 and P01 DK46763 and support for Ting-  
665 Fang from the Academia Sinica-UC San Diego Talent Development Program from  
666 Academia Sinica, Taiwan, R.O.C.

667

668 Author contributions:

669 W. Liu designed and performed the experiments to determine the structures and screen  
670 the mutants. S.C. Garrett-Thomson helped on the mutagenesis screening. E. Fedorov,  
671 U.A. Ramagopal and J.B. Bonanno helped on the structural determination. T.-F. Chou, K.  
672 Kakugawa, and H. Cheroutre designed and generated knockin mice. T.-F. Chou designed  
673 and performed the mouse experiments. G.-Y. Seo helped on the bacterial infection. S.C.  
674 Almo and M. Kronenberg conceived, supervised and managed the project. W. Liu, T.-F.  
675 Chou, M. Kronenberg, and S.C. Almo wrote the paper.

676

677 Disclosures: The authors declare no competing interests exist.

678 **References**

- 679 Biburger, M., and G. Tiegs. 2005. Alpha-galactosylceramide-induced liver injury in  
680 mice is mediated by TNF-alpha but independent of Kupffer cells. *Journal of*  
681 *immunology (Baltimore, Md. : 1950)* 175:1540-1550.
- 682 Bossen, C., K. Ingold, A. Tardivel, J.L. Bodmer, O. Gaide, S. Hertig, C. Ambrose, J.  
683 Tschopp, and P. Schneider. 2006. Interactions of tumor necrosis factor (TNF)  
684 and TNF receptor family members in the mouse and human. *The Journal of*  
685 *biological chemistry* 281:13964-13971.
- 686 Brunetti, G., R. Rizzi, A. Oranger, I. Gigante, G. Mori, G. Taurino, T. Mongelli, G.  
687 Colaianni, A. Di Benedetto, R. Tamma, G. Ingravallo, A. Napoli, M.F. Faienza, A.  
688 Mestice, P. Curci, G. Specchia, S. Colucci, and M. Grano. 2014. LIGHT/TNFSF14  
689 increases osteoclastogenesis and decreases osteoblastogenesis in multiple  
690 myeloma-bone disease. *Oncotarget* 5:12950-12967.
- 691 Cai, G., A. Anumanthan, J.A. Brown, E.A. Greenfield, B. Zhu, and G.J. Freeman. 2008.  
692 CD160 inhibits activation of human CD4+ T cells through interaction with  
693 herpesvirus entry mediator. *Nature immunology* 9:176-185.
- 694 Chellan, B., E.P. Koroleva, T.J. Sontag, A.V. Tumanov, Y.X. Fu, G.S. Getz, and C.A.  
695 Reardon. 2013. LIGHT/TNFSR14 can regulate hepatic lipase expression by  
696 hepatocytes independent of T cells and Kupffer cells. *PloS one* 8:e54719.
- 697 Cheung, T.C., L.M. Osborne, M.W. Steinberg, M.G. Macauley, S. Fukuyama, H. Sanjo, C.  
698 D'Souza, P.S. Norris, K. Pfeffer, K.M. Murphy, M. Kronenberg, P.G. Spear, and  
699 C.F. Ware. 2009a. T cell intrinsic heterodimeric complexes between HVEM and  
700 BTLA determine receptivity to the surrounding microenvironment. *Journal of*  
701 *immunology (Baltimore, Md. : 1950)* 183:7286-7296.
- 702 Cheung, T.C., M.W. Steinberg, L.M. Osborne, M.G. Macauley, S. Fukuyama, H. Sanjo, C.  
703 D'Souza, P.S. Norris, K. Pfeffer, K.M. Murphy, M. Kronenberg, P.G. Spear, and  
704 C.F. Ware. 2009b. Unconventional ligand activation of herpesvirus entry  
705 mediator signals cell survival. *Proceedings of the National Academy of Sciences*  
706 *of the United States of America* 106:6244-6249.
- 707 Compaan, D.M., L.C. Gonzalez, I. Tom, K.M. Loyet, D. Eaton, and S.G. Hymowitz. 2005.  
708 Attenuating lymphocyte activity: the crystal structure of the BTLA-HVEM  
709 complex. *The Journal of biological chemistry* 280:39553-39561.
- 710 Desai, P., G. Abboud, J. Stanfield, P.G. Thomas, J. Song, C.F. Ware, M. Croft, and S. Salek-  
711 Ardakani. 2017. HVEM Imprints Memory Potential on Effector CD8 T Cells  
712 Required for Protective Mucosal Immunity. *J Immunol* 199:2968-2975.
- 713 Doherty, T.A., P. Soroosh, N. Khorram, S. Fukuyama, P. Rosenthal, J.Y. Cho, P.S. Norris,  
714 H. Choi, S. Scheu, K. Pfeffer, B.L. Zuraw, C.F. Ware, D.H. Broide, and M. Croft.  
715 2011. The tumor necrosis factor family member LIGHT is a target for  
716 asthmatic airway remodeling. *Nat Med* 17:596-603.
- 717 Emsley, P., B. Lohkamp, W.G. Scott, and K. Cowtan. 2010. Features and development  
718 of Coot. *Acta crystallographica. Section D, Biological crystallography* 66:486-  
719 501.
- 720 Giles, D.A., S. Zahner, P. Krause, E. Van Der Gracht, T. Riffelmacher, V. Morris, A.  
721 Tumanov, and M. Kronenberg. 2018. The Tumor Necrosis Factor Superfamily  
722 Members TNFSF14 (LIGHT), Lymphotoxin beta and Lymphotoxin beta  
723 Receptor Interact to Regulate Intestinal Inflammation. *Front Immunol* 9:2585.

- 724 Harrop, J.A., P.C. McDonnell, M. Brigham-Burke, S.D. Lyn, J. Minton, K.B. Tan, K. Dede,  
725 J. Spampanato, C. Silverman, P. Hensley, R. DiPrinzio, J.G. Emery, K. Deen, C.  
726 Eichman, M. Chabot-Fletcher, A. Truneh, and P.R. Young. 1998a. Herpesvirus  
727 entry mediator ligand (HVEM-L), a novel ligand for HVEM/TR2, stimulates  
728 proliferation of T cells and inhibits HT29 cell growth. *The Journal of biological*  
729 *chemistry* 273:27548-27556.
- 730 Harrop, J.A., M. Reddy, K. Dede, M. Brigham-Burke, S. Lyn, K.B. Tan, C. Silverman, C.  
731 Eichman, R. DiPrinzio, J. Spampanato, T. Porter, S. Holmes, P.R. Young, and A.  
732 Truneh. 1998b. Antibodies to TR2 (herpesvirus entry mediator), a new  
733 member of the TNF receptor superfamily, block T cell proliferation, expression  
734 of activation markers, and production of cytokines. *Journal of immunology*  
735 *(Baltimore, Md. : 1950)* 161:1786-1794.
- 736 Hemingway, F., T.G. Kashima, H.J. Knowles, and N.A. Athanasou. 2013. Investigation  
737 of osteoclastogenic signalling of the RANKL substitute LIGHT. *Experimental*  
738 *and molecular pathology* 94:380-385.
- 739 Herro, R., J.W. Shui, S. Zahner, D. Sidler, Y. Kawakami, T. Kawakami, K. Tamada, M.  
740 Kronenberg, and M. Croft. 2018. LIGHT-HVEM signaling in keratinocytes  
741 controls development of dermatitis. *The Journal of experimental medicine*  
742 215:415-422.
- 743 Iwata, A., N. Watanabe, Y. Oya, T. Owada, K. Ikeda, A. Suto, S. Kagami, K. Hirose, H.  
744 Kanari, S. Kawashima, T. Nakayama, M. Taniguchi, I. Iwamoto, and H. Nakajima.  
745 2010. Protective roles of B and T lymphocyte attenuator in NKT cell-mediated  
746 experimental hepatitis. *Journal of immunology (Baltimore, Md. : 1950)*  
747 184:127-133.
- 748 Kim, T.J., G. Park, J. Kim, S.A. Lim, J. Kim, K. Im, M.H. Shin, Y.X. Fu, M.L. Del Rio, J.I.  
749 Rodriguez-Barbosa, C. Yee, K.S. Suh, S.J. Kim, S.J. Ha, and K.M. Lee. 2019. CD160  
750 serves as a negative regulator of NKT cells in acute hepatic injury. *Nat Commun*  
751 10:3258.
- 752 Le Bouteiller, P., A. Barakonyi, J. Giustiniani, F. Lenfant, A. Marie-Cardine, M. Aguerre-  
753 Girr, M. Rabot, I. Hilgert, F. Mami-Chouaib, J. Tabiasco, L. Boumsell, and A.  
754 Bensussan. 2002. Engagement of CD160 receptor by HLA-C is a triggering  
755 mechanism used by circulating natural killer (NK) cells to mediate  
756 cytotoxicity. *Proceedings of the National Academy of Sciences of the United*  
757 *States of America* 99:16963-16968.
- 758 Liu, W., S.C. Garrett, E.V. Fedorov, U.A. Ramagopal, S.J. Garforth, J.B. Bonanno, and S.C.  
759 Almo. 2019. Structural Basis of CD160:HVEM Recognition. *Structure* 27:1286-  
760 1295.e1284.
- 761 Liu, W., V. Vigdorovich, C. Zhan, Y. Patskovsky, J.B. Bonanno, S.G. Nathenson, and S.C.  
762 Almo. 2015. Increased Heterologous Protein Expression in Drosophila S2 Cells  
763 for Massive Production of Immune Ligands/Receptors and Structural Analysis  
764 of Human HVEM. *Molecular biotechnology* 57:914-922.
- 765 Lo, J.C., Y. Wang, A.V. Tumanov, M. Bamji, Z. Yao, C.A. Reardon, G.S. Getz, and Y.X. Fu.  
766 2007. Lymphotoxin beta receptor-dependent control of lipid homeostasis.  
767 *Science* 316:285-288.
- 768 Maeda, M., C. Carpenito, R.C. Russell, J. Dasanjh, L.L. Veinotte, H. Ohta, T. Yamamura,  
769 R. Tan, and F. Takei. 2005. Murine CD160, Ig-like receptor on NK cells and NKT

- 770 cells, recognizes classical and nonclassical MHC class I and regulates NK cell  
771 activation. *Journal of immunology (Baltimore, Md. : 1950)* 175:4426-4432.
- 772 Mana, P., D. Linares, D.G. Silva, S. Fordham, S. Scheu, K. Pfeffer, M. Staykova, and E.M.  
773 Bertram. 2013. LIGHT (TNFSF14/CD258) is a decisive factor for recovery from  
774 experimental autoimmune encephalomyelitis. *Journal of immunology*  
775 *(Baltimore, Md. : 1950)* 191:154-163.
- 776 Miller, M.L., Y. Sun, and Y.X. Fu. 2009. Cutting edge: B and T lymphocyte attenuator  
777 signaling on NKT cells inhibits cytokine release and tissue injury in early  
778 immune responses. *Journal of immunology (Baltimore, Md. : 1950)* 183:32-36.
- 779 Mintz, M.A., J.H. Felce, M.Y. Chou, V. Mayya, Y. Xu, J.W. Shui, J. An, Z. Li, A. Marson, T.  
780 Okada, C.F. Ware, M. Kronenberg, M.L. Dustin, and J.G. Cyster. 2019. The HVEM-  
781 BTLA Axis Restrains T Cell Help to Germinal Center B Cells and Functions as a  
782 Cell-Extrinsic Suppressor in Lymphomagenesis. *Immunity* 51:310-323 e317.
- 783 Montgomery, R.I., M.S. Warner, B.J. Lum, and P.G. Spear. 1996. Herpes simplex virus-  
784 1 entry into cells mediated by a novel member of the TNF/NGF receptor  
785 family. *Cell* 87:427-436.
- 786 Murphy, T.L., and K.M. Murphy. 2010. Slow down and survive: Enigmatic  
787 immunoregulation by BTLA and HVEM. *Annu Rev Immunol* 28:389-411.
- 788 Okwor, I., G. Xu, H. Tang, Y. Liang, Y.X. Fu, and J.E. Uzonna. 2015. Deficiency of CD40  
789 Reveals an Important Role for LIGHT in Anti-Leishmania Immunity. *Journal of*  
790 *immunology (Baltimore, Md. : 1950)* 195:194-202.
- 791 Otwinowski, Z., and W. Minor. 1997. Processing of X-ray diffraction data. *Methods*  
792 *enzymol* 276:307-326.
- 793 Pasero, C., and D. Olive. 2013. Interfering with coinhibitory molecules: BTLA/HVEM  
794 as new targets to enhance anti-tumor immunity. *Immunol Lett* 151:71-75.
- 795 Petreaca, M.L., D. Do, S. Dhall, D. McLelland, A. Serafino, J. Lyubovitsky, N. Schiller, and  
796 M.M. Martins-Green. 2012. Deletion of a tumor necrosis superfamily gene in  
797 mice leads to impaired healing that mimics chronic wounds in humans. *Wound*  
798 *Repair Regen* 20:353-366.
- 799 Rooney, I.A., K.D. Butrovich, A.A. Glass, S. Borboroglu, C.A. Benedict, J.C. Whitbeck, G.H.  
800 Cohen, R.J. Eisenberg, and C.F. Ware. 2000. The lymphotoxin-beta receptor is  
801 necessary and sufficient for LIGHT-mediated apoptosis of tumor cells. *The*  
802 *Journal of biological chemistry* 275:14307-14315.
- 803 Sedy, J.R., and P. Ramezani-Rad. 2019. HVEM network signaling in cancer. *Adv Cancer*  
804 *Res* 142:145-186.
- 805 Seo, G.Y., J.W. Shui, D. Takahashi, C. Song, Q. Wang, K. Kim, Z. Mikulski, S. Chandra, D.A.  
806 Giles, S. Zahner, P.H. Kim, H. Cheroutre, M. Colonna, and M. Kronenberg. 2018.  
807 LIGHT-HVEM Signaling in Innate Lymphoid Cell Subsets Protects Against  
808 Enteric Bacterial Infection. *Cell Host Microbe* 24:249-260 e244.
- 809 Shrestha, R., S.C. Garrett-Thomson, W. Liu, S.C. Almo, and A. Fiser. 2020. Redesigning  
810 HVEM Interface for Selective Binding to LIGHT, BTLA, and CD160. *Structure*  
811 28:1197-1205 e1192.
- 812 Shui, J.W., A. Larange, G. Kim, J.L. Vela, S. Zahner, H. Cheroutre, and M. Kronenberg.  
813 2012. HVEM signalling at mucosal barriers provides host defence against  
814 pathogenic bacteria. *Nature* 488:222-225.



- 815 Steinberg, M.W., T.C. Cheung, and C.F. Ware. 2011. The signaling networks of the  
816 herpesvirus entry mediator (TNFRSF14) in immune regulation. *Immunol Rev*  
817 244:169-187.
- 818 Tamada, K., K. Shimozaki, A.I. Chapoval, Y. Zhai, J. Su, S.F. Chen, S.L. Hsieh, S. Nagata, J.  
819 Ni, and L. Chen. 2000. LIGHT, a TNF-like molecule, costimulates T cell  
820 proliferation and is required for dendritic cell-mediated allogeneic T cell  
821 response. *Journal of immunology (Baltimore, Md. : 1950)* 164:4105-4110.
- 822 Tan, C.L., M.J. Peluso, J.M. Drijvers, C.M. Mera, S.M. Grande, K.E. Brown, J. Godec, G.J.  
823 Freeman, and A.H. Sharpe. 2018. CD160 Stimulates CD8(+) T Cell Responses  
824 and Is Required for Optimal Protective Immunity to *Listeria monocytogenes*.  
825 *Immunohorizons* 2:238-250.
- 826 Tiller, G., H. Laumen, P. Fischer-Posovszky, A. Finck, T. Skurk, M. Keuper, U.  
827 Brinkmann, M. Wabitsch, D. Link, and H. Hauner. 2011. LIGHT (TNFSF14)  
828 inhibits adipose differentiation without affecting adipocyte metabolism. *Int J*  
829 *Obes (Lond)* 35:208-216.
- 830 Trulzsch, K., T. Sporleder, E.I. Igwe, H. Russmann, and J. Heesemann. 2004.  
831 Contribution of the major secreted yops of *Yersinia enterocolitica* O:8 to  
832 pathogenicity in the mouse infection model. *Infect Immun* 72:5227-5234.
- 833 Tu, T.C., N.K. Brown, T.J. Kim, J. Wroblewska, X. Yang, X. Guo, S.H. Lee, V. Kumar, K.M.  
834 Lee, and Y.X. Fu. 2015. CD160 is essential for NK-mediated IFN-gamma  
835 production. *The Journal of experimental medicine* 212:415-429.
- 836 Wang, H., D. Feng, O. Park, S. Yin, and B. Gao. 2013. Invariant NKT cell activation  
837 induces neutrophil accumulation and hepatitis: opposite regulation by IL-4  
838 and IFN-gamma. *Hepatology* 58:1474-1485.
- 839 Whitbeck, J.C., C. Peng, H. Lou, R. Xu, S.H. Willis, M. Ponce de Leon, T. Peng, A.V. Nicola,  
840 R.I. Montgomery, M.S. Warner, A.M. Soulika, L.A. Spruce, W.T. Moore, J.D.  
841 Lambris, P.G. Spear, G.H. Cohen, and R.J. Eisenberg. 1997. Glycoprotein D of  
842 herpes simplex virus (HSV) binds directly to HVEM, a member of the tumor  
843 necrosis factor receptor superfamily and a mediator of HSV entry. *Journal of*  
844 *virology* 71:6083-6093.
- 845 Winn, M.D., C.C. Ballard, K.D. Cowtan, E.J. Dodson, P. Emsley, P.R. Evans, R.M. Keegan,  
846 E.B. Krissinel, A.G. Leslie, A. McCoy, S.J. McNicholas, G.N. Murshudov, N.S.  
847 Pannu, E.A. Potterton, H.R. Powell, R.J. Read, A. Vagin, and K.S. Wilson. 2011.  
848 Overview of the CCP4 suite and current developments. *Acta crystallographica.*  
849 *Section D, Biological crystallography* 67:235-242.
- 850 Zhai, Y., R. Guo, T.L. Hsu, G.L. Yu, J. Ni, B.S. Kwon, G.W. Jiang, J. Lu, J. Tan, M. Ugustus, K.  
851 Carter, L. Rojas, F. Zhu, C. Lincoln, G. Endress, L. Xing, S. Wang, K.O. Oh, R. Gentz,  
852 S. Ruben, M.E. Lippman, S.L. Hsieh, and D. Yang. 1998. LIGHT, a novel ligand  
853 for lymphotoxin beta receptor and TR2/HVEM induces apoptosis and  
854 suppresses in vivo tumor formation via gene transfer. *The Journal of clinical*  
855 *investigation* 102:1142-1151.
- 856 Zhu, M., Y. Yang, Y. Wang, Z. Wang, and Y.X. Fu. 2011. LIGHT regulates inflamed  
857 draining lymph node hypertrophy. *Journal of immunology (Baltimore, Md. : 1950)*  
858 186:7156-7163.
- 859 Zhu, Y., S. Yao, M.M. Augustine, H. Xu, J. Wang, J. Sun, M. Broadwater, W. Ruff, L. Luo,  
860 G. Zhu, K. Tamada, and L. Chen. 2016. Neuron-specific SALM5 limits

861 inflammation in the CNS via its interaction with HVEM. *Science advances*  
862 2:e1500637.  
863  
864

865 **Figures and Tables**

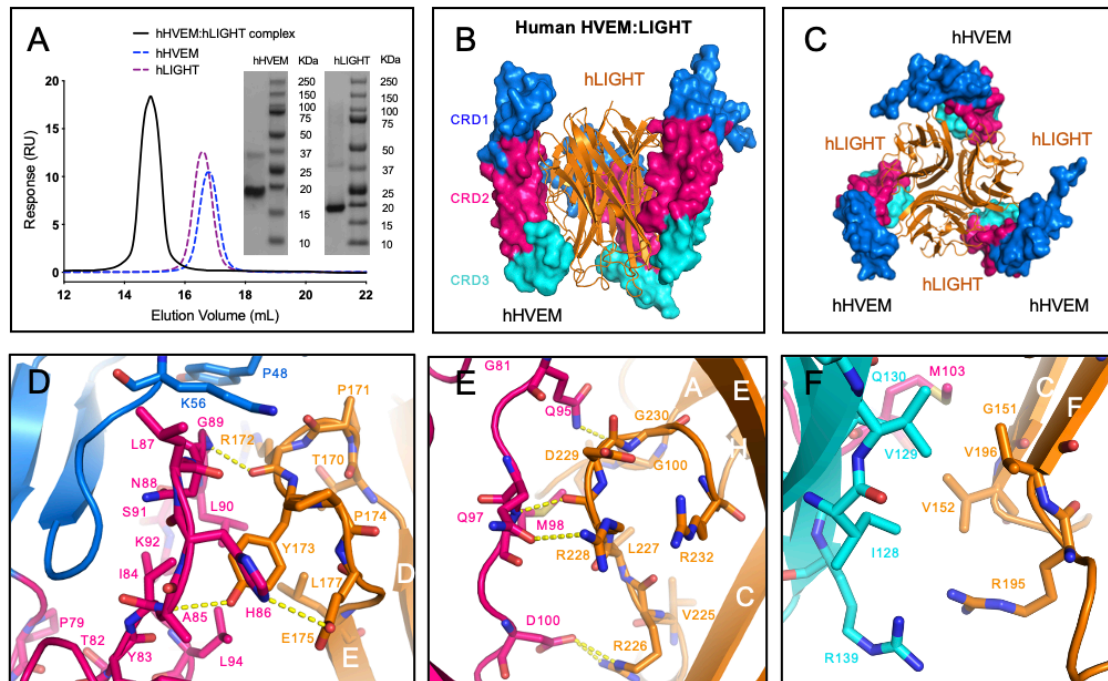

866

867 **Figure 1. Crystal structure of human HVEM:LIGHT complex exhibits a 3:3**  
868 **stoichiometry.**

869 **(A)** The analytical SEC trace of hHVEM and hLIGHT mixtures reveals a significant peak  
870 of the complex corresponding to the molecular weight around 100 kDa. The SDS-PAGE  
871 results indicate hHVEM and hLIGHT were purified to near homogeneity. Note that in the  
872 SDS gel, LIGHT trimers dissociate. **(B and C)** The hHVEM is shown as a surface and  
873 each CRD domain is colored separately as indicated in the figure. The trimeric hLIGHT  
874 protein is shown as an orange ribbon in the figure. The side view **(B)** and bottom view **(C)**  
875 of the hHVEM:hLIGHT complex are shown. **(D-F)** The detailed interaction interface  
876 between hHVEM and hLIGHT. The hHVEM CRD1, CRD2, and CRD3 residues are colored  
877 as marine, hot pink, and cyan, respectively. hLIGHT residues are colored as orange. The  
878 hydrogen bonds between hHVEM and hLIGHT are indicated as dashed lines.

879

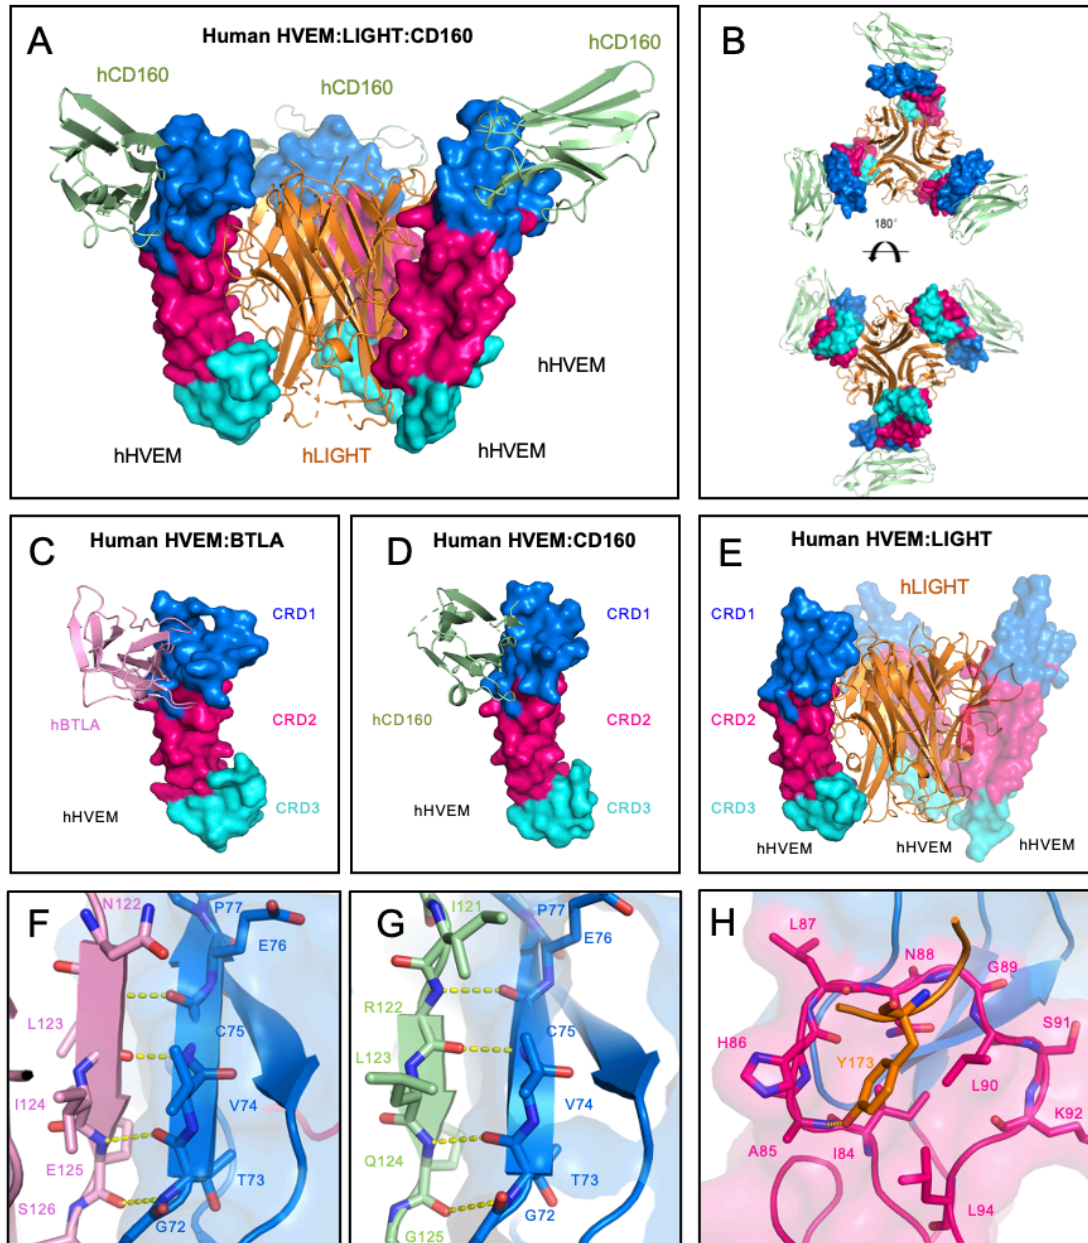

880

881 **Figure 2. Overall structure of HVEM:LIGHT:CD160 ternary complex and critical**  
882 **interaction interfaces of HVEM binding to BTLA, CD160 and LIGHT.**

883 **(A and B)** Structure of the hHVEM:hLIGHT:hCD160 ternary complex indicates hCD160  
884 and hLIGHT can interact simultaneously with hHVEM. The side view **(A)** and the  
885 top/bottom views **(B)** of the ternary complex are shown. **(C)** Structure of hHVEM:hBTLA  
886 (PDB entry 2AW2). **(D)** Structure of hHVEM:hCD160 (PDB entry 6NG3). **(E)** Structure of

887 hHVEM:hLIGHT (PDB entry 4RSU). These structures indicate hBTLA and hCD160 bind  
888 to similar surfaces on hHVEM, whereas hLIGHT binds to a different surface on hHVEM.  
889 **(F-H)** Detail binding interfaces between hHVEM and its binding ligands hBTLA, hCD160  
890 and hLIGHT, respectively. The hHVEM CRD1 and CRD2 domains are colored as marine  
891 and hot pink, respectively.  
892  
893

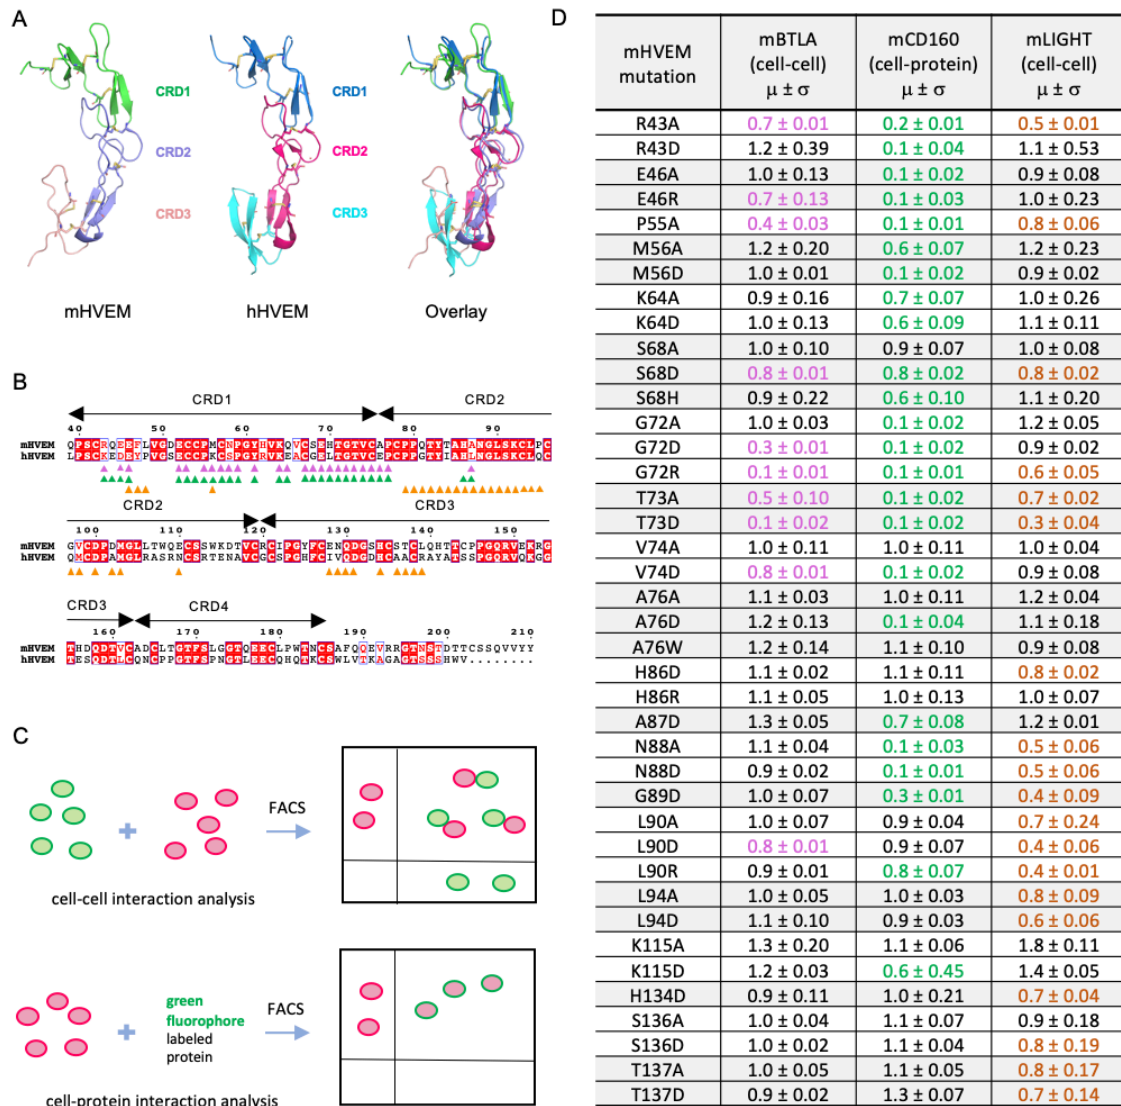

894

895

896 **Figure 3. Structure and mutagenesis screen of mHVEM.**

897 **(A)** Structures of mHVEM, hHVEM and their comparison. The disulfide bonds of HVEM  
 898 are shown as sticks and each HVEM CRD is colored differently. **(B)** Sequence alignment  
 899 of mHVEM and hHVEM. The homologous residues are highlighted in red. The residues of  
 900 hHVEM directly involved in the interface with hBTLA, hCD160, and hLIGHT are marked  
 901 by magenta, green and orange triangles, respectively. **(C)** The schematic figure shows  
 902 two ways to determine the relative binding affinities of mHVEM mutants. The cell-cell

903 method measures the percentages of double positive cells in the mixtures. The cell-protein  
904 method measures the percentages of green-fluorophore stained mHVEM-mCherry  
905 expressing cells. **(D)** Relative binding affinities of mHVEM mutants with its ligands are  
906 shown in the table. Both mBTLA and mLIGHT binding to mHVEM was assessed by cell-  
907 cell method. The mCD160 binding to mHVEM was tested by cell-protein method. Error  
908 bars represent results from at least triplicates. All mHVEM mutants with  $\geq 20\%$  binding  
909 reduction to a particular query are colored differently to indicate their reduced affinities.  
910

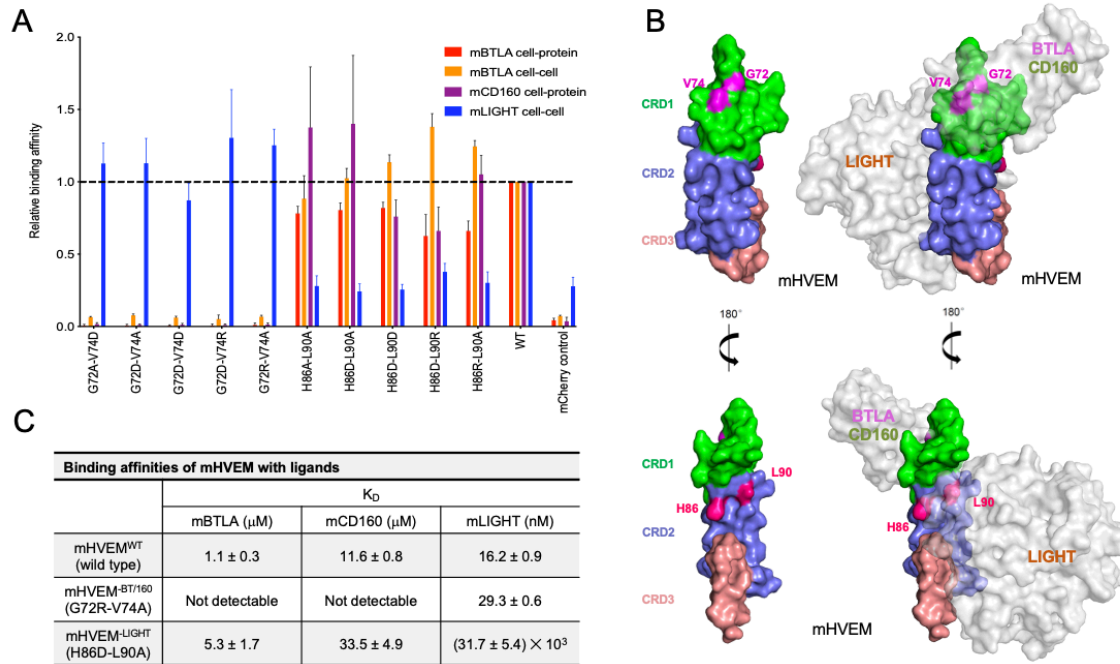

911

912 **Figure 4. The engineered mHVEM mutants have binding selectivity.**

913 **(A)** The relative binding affinities of mHVEM mutants with mBTLA, mCD160, and mLIGHT  
 914 as measured by cell-cell or cell-protein methods. Error bars represent results from at least  
 915 triplicates. The grey dashed line marks the averaged normalized affinities of wild-type  
 916 mHVEM with mBTLA, mCD160, and mLIGHT. **(B)** The locations of the mutated residues  
 917 on mHVEM. mHVEM is shown as surface with each CRD colored differently with G72,  
 918 V74, H86 and L90 are marked on the mHVEM surface. Ligands BTLA, CD160 and LIGHT  
 919 are modeled based on the HVEM structures and are shown as labeled grey surfaces. **(C)**  
 920 The binding affinities of mHVEM<sup>WT</sup> (wild-type mHVEM), mHVEM<sup>BT/160</sup> (mHVEM G72R-  
 921 V74A double mutein) and mHVEM<sup>LIGHT</sup> (mHVEM H86D-L90A double mutein) with  
 922 mBTLA, mCD160 and mLIGHT as measured by Octet bio-layer interferometry (BLI)  
 923 technology.



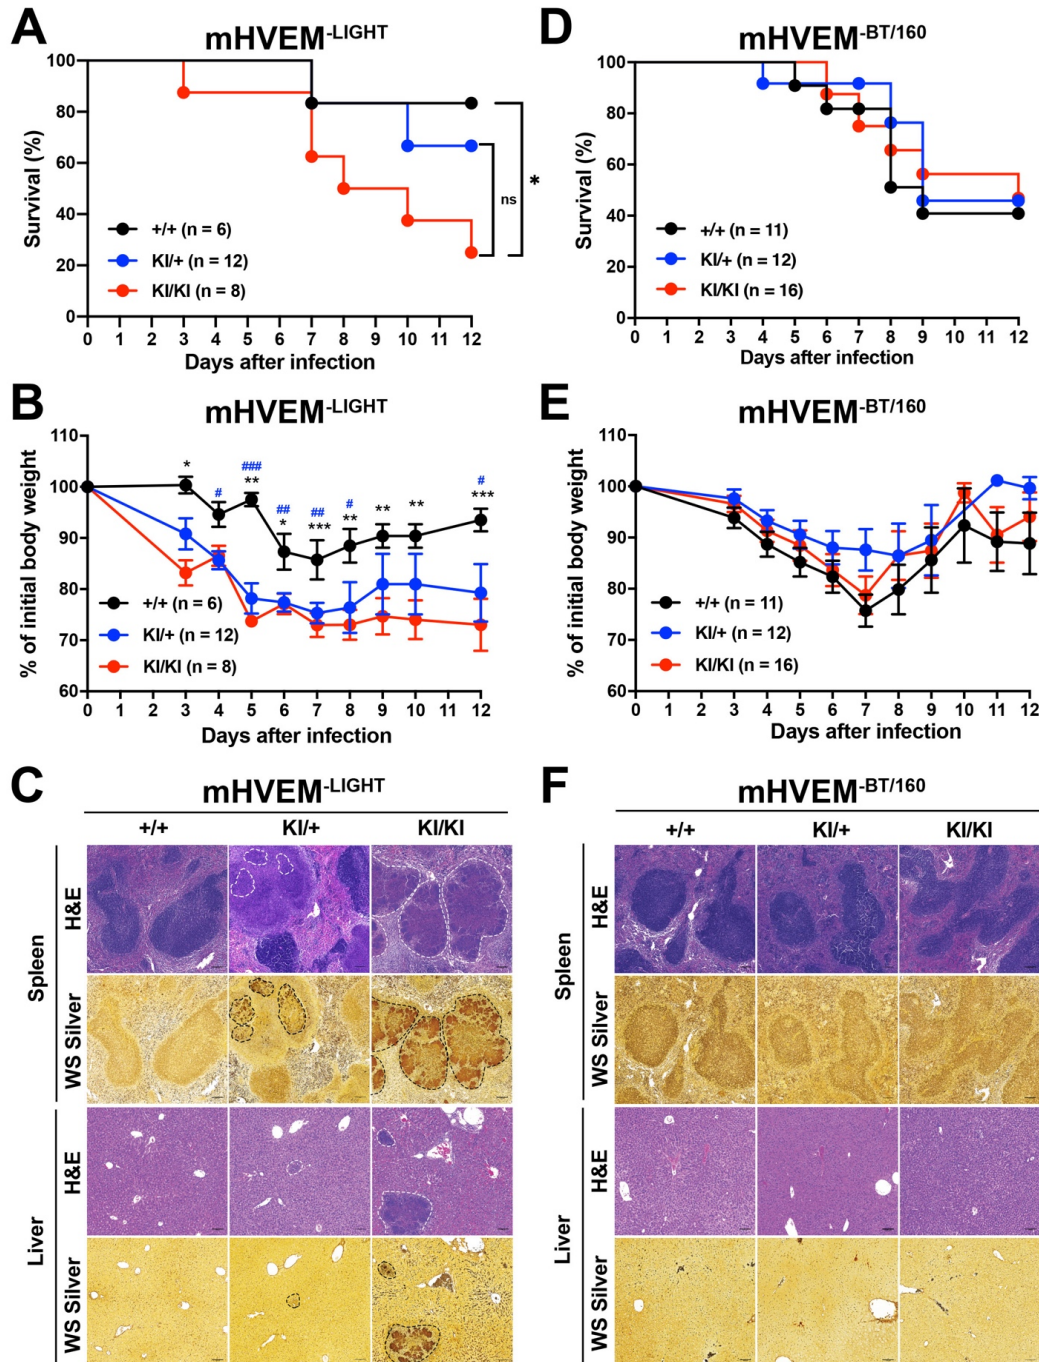

924

925 **Figure 5. mHVEM<sup>-LIGHT</sup> mice were more susceptible to *Y. enterocolitica* infection.**

926 Male mice were infected with  $1.0 \times 10^8$  *Y. enterocolitica*. KI = gene knockin. **(A and D)**

927 Survival curves. NS, not significant. \* $P = 0.047$  for Log-rank test. **(B and E)** Changes in

928 body weight (% of baseline). \* $P < 0.05$ ; \*\* $P < 0.01$ ; \*\*\* $P < 0.001$  (+/+ vs KI/KI) or # $P < 0.05$ ;

929  $##P < 0.01$ ;  $###P < 0.001$  (+/+ vs KI/+) for two-way ANOVA with Bonferroni's multiple  
930 hypothesis correction. **(C and F)** Representative hematoxylin and eosin (H&E) staining to  
931 detect necrotic areas and Warthin-Starry (WS) silver staining to detect bacteria in splenic  
932 and hepatic sections from the indicated mice at 7 days after infection. Scale bars, 100  $\mu\text{m}$ .  
933 White dotted lines indicate necrotic areas and black dotted lines indicate *Y. enterocolitica*.  
934 Data shown are mean  $\pm$  s.e.m., and represent pooled results from at least two independent  
935 experiments having at least three mice per group in each experiment (n= 6-12 mice per  
936 group; co-housed littermates). Because of the number of mice that could be handled,  
937 experimental data in A-C were done at a different time with a different bacterial culture  
938 from D-E.  
939

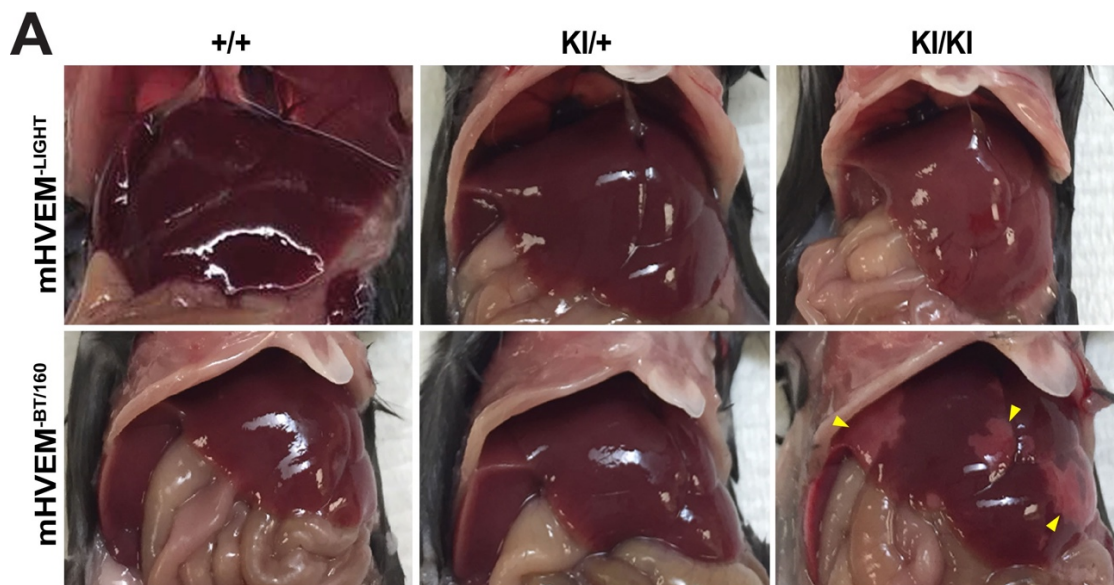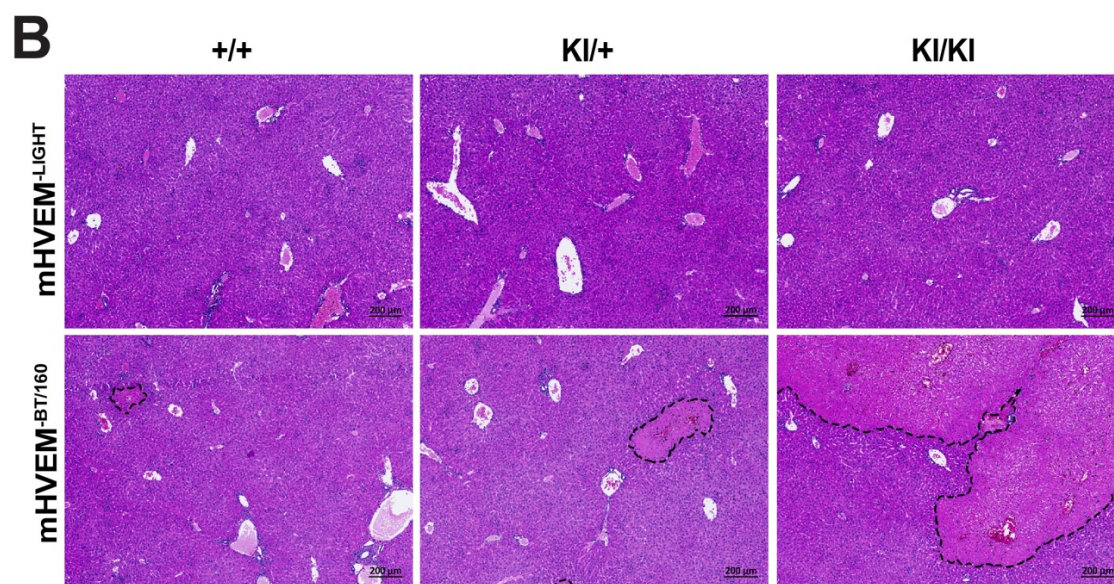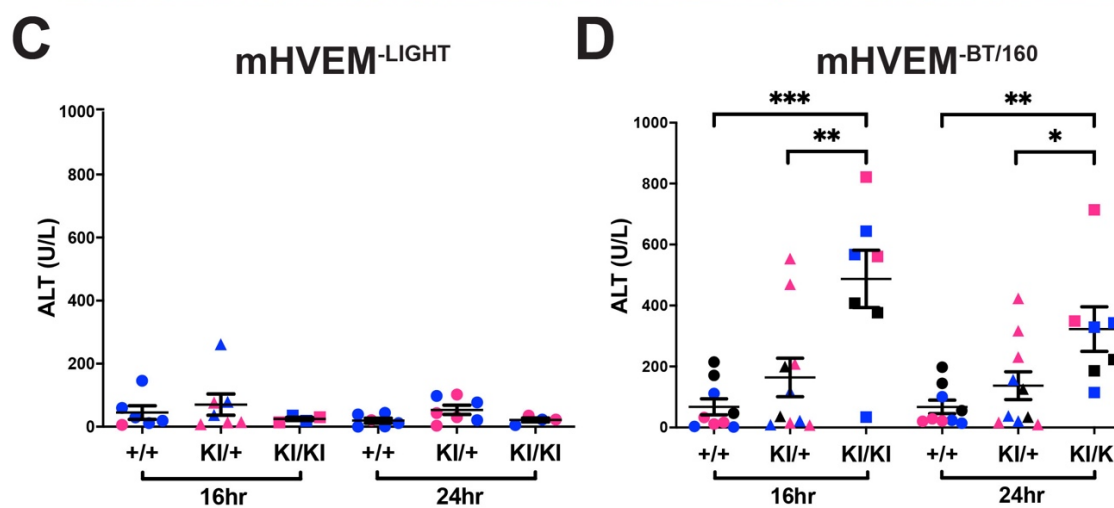

940

941 **Figure 6. Susceptibility to  $\alpha$ GalCer-induced liver injury in mHVEM<sup>-BT/160</sup> mice.**

942 Mice were injected with 2  $\mu$ g  $\alpha$ GalCer by the retro-orbital route. **(A)** Representative images  
943 of the liver 24 h after injection. Yellow triangles indicate necrotic areas. **(B)** Representative  
944 H&E staining of hepatic sections from the indicated mice 24 h after injection. Black dotted  
945 lines indicate the necrotic areas. Scale bars, 200  $\mu$ m. **(C and D)** Serum ALT activity at 16  
946 and 24 h from the indicated mice. Data shown are mean  $\pm$  s.e.m.. \* $P$  < 0.05; \*\* $P$  < 0.01;  
947 \*\*\* $P$  < 0.001 for one-way ANOVA. Data represent pooled results from at least two  
948 independent experiments; each experiment labeled with different colored symbols (n= 4-  
949 10 mice per group; co-housed littermates).

950

**Table 1. Data Collection and Refinement Statistics**

|                                    | hHVEM:hLIGHT                                  | hHVEM:hLIGHT:hCD160       | mHVEM                            |
|------------------------------------|-----------------------------------------------|---------------------------|----------------------------------|
| <b>Data Collection</b>             |                                               |                           |                                  |
| Wavelength used (Å)                | 1.075                                         | 0.97931                   | 0.97931                          |
| Resolution range (Å)               | 2.30-50.00<br>(2.30-2.34)                     | 3.50-50.00<br>(3.50-3.83) | 2.10-50.00<br>(2.10-2.14)        |
| Space group                        | P2 <sub>1</sub> 2 <sub>1</sub> 2 <sub>1</sub> | I23                       | P4 <sub>1</sub> 2 <sub>1</sub> 2 |
| Unit cell (Å)                      | a=111.7,<br>b=113.6,<br>c=163.3               | a=b=c=214.7               | a=b=64.7,<br>c=69.0              |
| Unique reflections (N)             | 92792                                         | 20868                     | 8989                             |
| Redundancy                         | 10.8(10.7)                                    | 20.7 (17.9)               | 13.5 (9.9)                       |
| Completeness                       | 99.9(99.7)                                    | 99.9 (100)                | 99.5 (99.1)                      |
| I/sigma                            | 22.7 (3.1)                                    | 16.1 (2.2)                | 17.1 (2.2)                       |
| R <sub>merge</sub>                 | 0.125 (0.936)                                 | 0.191 (1.674)             | 0.135 (0.938)                    |
| CC <sub>1/2</sub>                  | N/A                                           | 0.999 (0.676)             | 0.999 (0.943)                    |
| <b>Refinement</b>                  |                                               |                           |                                  |
| Resolution range (Å)               | 2.30-48.92<br>(2.30-2.36)                     | 3.50-19.93<br>(3.50-3.59) | 2.10-20.00<br>(2.10-2.16)        |
| R <sub>work</sub>                  | 0.188 (0.245)                                 | 0.257 (0.370)             | 0.212 (0.355)                    |
| R <sub>free</sub>                  | 0.231 (0.270)                                 | 0.285 (0.293)             | 0.257 (0.328)                    |
| Average B factor (Å <sup>2</sup> ) | 38.4                                          | 139.9                     | 55.5                             |
| Rms bond (Å)                       | 0.021                                         | 0.005                     | 0.018                            |
| Rms angles (°)                     | 2.081                                         | 1.290                     | 1.928                            |
| PDB code                           | 4RSU                                          | 7MSG                      | 7MSJ                             |

$$R_{\text{merge}} = \frac{\sum_{hkl} \sum_i |I_i(hkl) - \langle I(hkl) \rangle|}{\sum_{hkl} \sum_i I_i(hkl)}$$

$$R_{\text{work}} = \frac{\sum |F_c - F_o|}{\sum F_o}$$

Parentheses indicate statistics for the highest resolution bin.

951

952

953 **Supplemental Material**

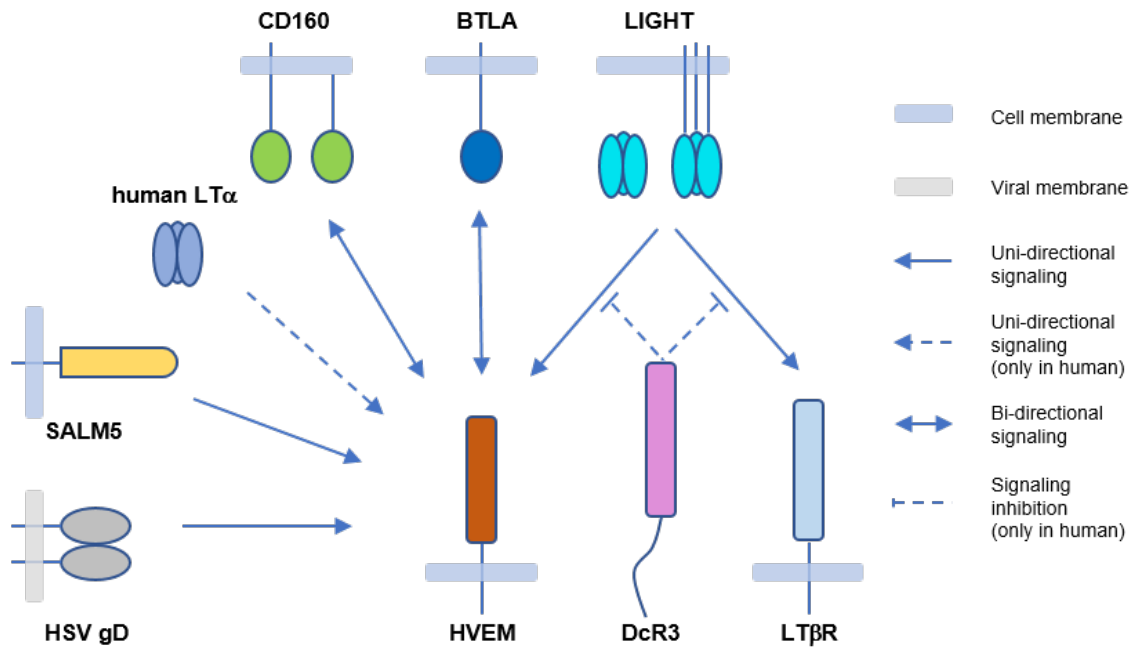

954

955 **Figure S1. A diagram of the HVEM interaction network.**

956 HVEM can be activated by HSV gD, SALM5, CD160, BTLA, LIGHT, and for human HVEM,  
957 weakly by LT $\alpha$ . The interactions of HVEM with CD160 and BTLA result in bi-directional  
958 signaling to activate CD160 and BTLA as well as HVEM. LIGHT also engages LT $\beta$ R  
959 besides HVEM, whereas these interactions can be neutralized by soluble DcR3 in  
960 humans.

961

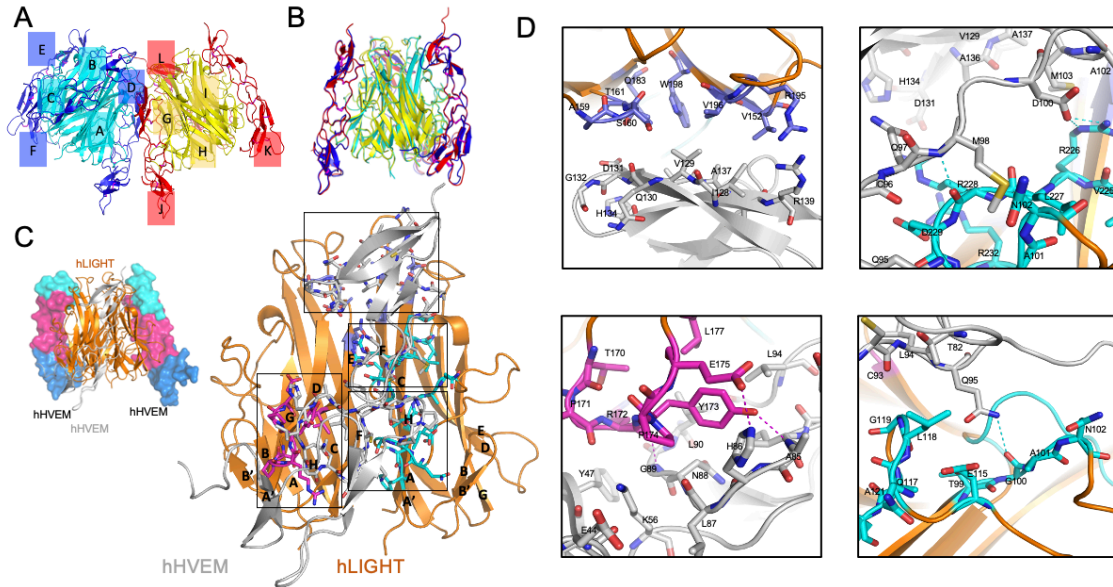

962

963 **Figure S2. Overall structure of hHVEM:hLIGHT complex and the binding interface**  
964 **between hHVEM and hLIGHT.**

965 **(A and B)** One asymmetry unit contains 6 independent chains of hLIGHT (cyan and yellow  
966 cartoon) and 6 independent chains of hHVEM (blue and red cartoon) forming two  
967 independent 3:3 hHVEM:hLIGHT complexes. Each chain is labeled in the figure. **(A)** Side  
968 view of the two hHVEM:hLIGHT complexes in one asymmetry unit. **(B)** Side view of the  
969 superimposition result of the two hHVEM:hLIGHT complexes. **(C)** The overall structure of  
970 the hHVEM:hLIGHT complex (top left) and magnified view of one copy hHVEM binding to  
971 two adjacent hLIGHT monomers (bottom right). The hLIGHT is shown as orange cartoon.  
972 The hHVEM is presented as grey cartoon for one copy and CRD colored surface for two  
973 copies. **(D)** Magnified views of the binding interface between hHVEM and hLIGHT. The  
974 residues from the “upper” region of the hHVEM:hLIGHT complex are shown as marine  
975 color sticks on the top left panel. The residues from the AA’ and GH loops part of the  
976 “lower” region of the hHVEM:hLIGHT interface are shown as cyan sticks on the top right  
977 and bottom right panels. The residues from the DE loop part of the “lower” region of the  
978 hHVEM:hLIGHT interface are shown as magenta sticks on bottom left panel. The residues

979 of hHVEM contributing to the interface are presented as grey sticks. The interaction  
980 interface of the “upper” region between hLIGHT and hHVEM (top left panel). The  
981 interaction interface between the GH loop of hLIGHT and hHVEM (top right panel). The  
982 interaction interface between the DE loop of hLIGHT and hHVEM (bottom left panel). The  
983 interaction interface between the AA’ loop of hLIGHT and hHVEM (bottom right panel).  
984



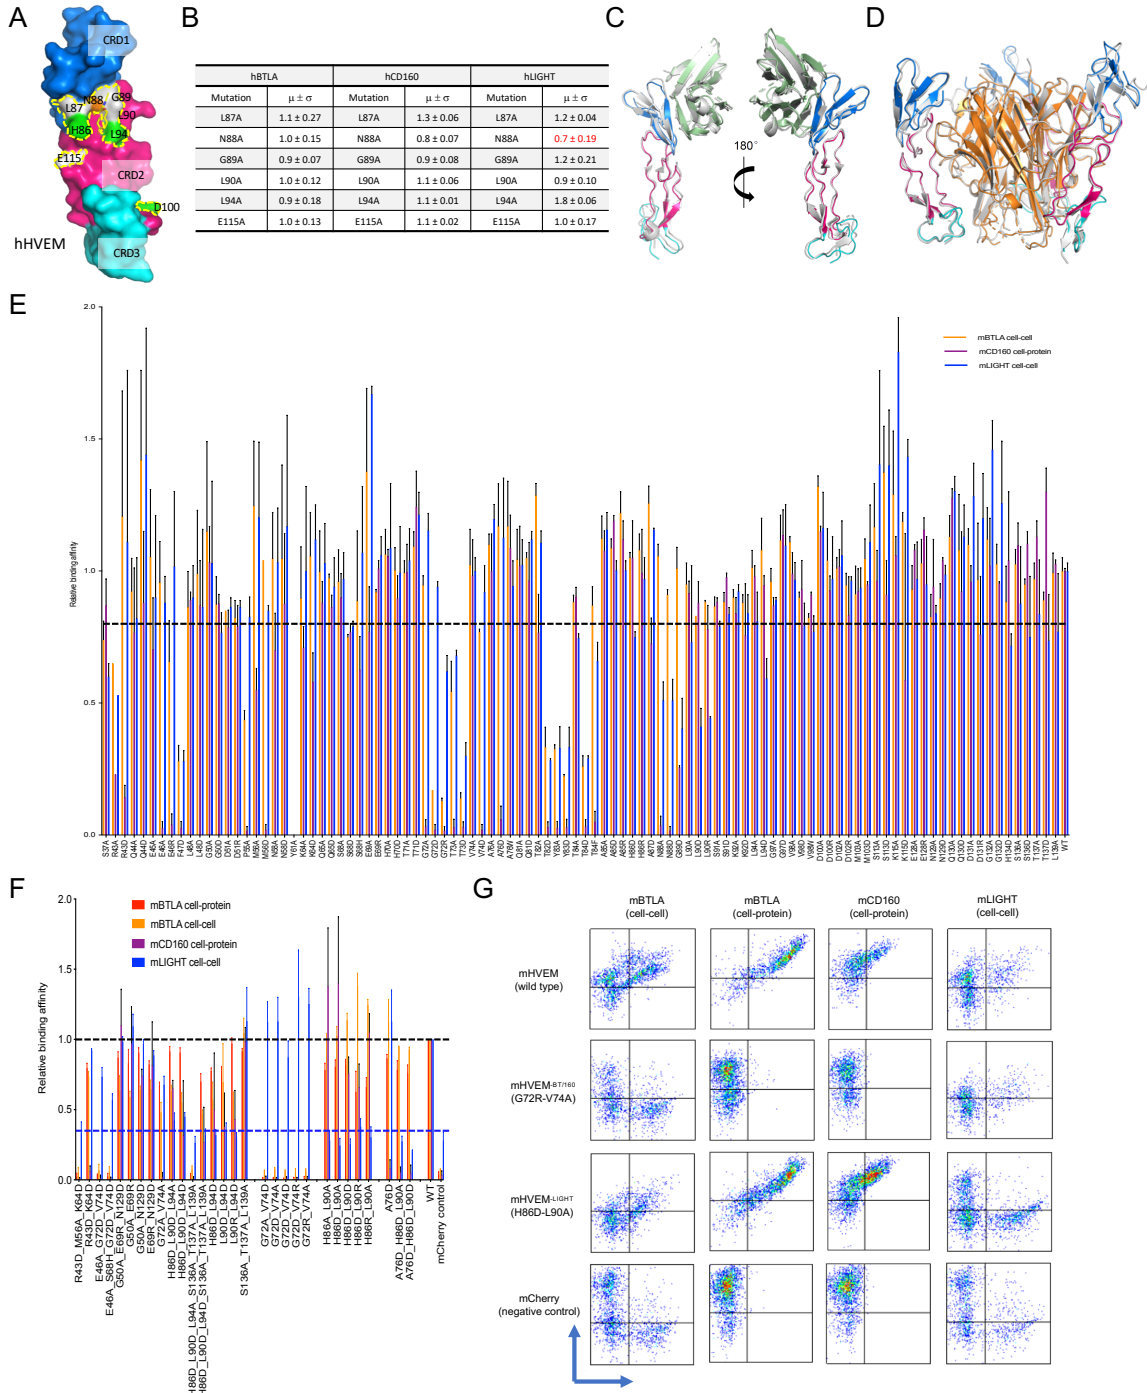

985  
986

**Figure S3. Relative binding affinities of HVEM mutants with BTLA, CD160, and LIGHT.**

987

(A and B) The hHVEM mutants were expressed on cell surface and were stained by hCD160, hBTLA, and hLIGHT proteins. The relative binding affinities were measured by flow cytometry. Error bars represent results from at least triplicates. (A) shows the

990

991 positions of the hHVEM mutation residues. The residue hLIGHT Y173 (highlighted in  
992 yellow) is shown as yellow stick in the structure. **(B)** shows the relative binding affinities of  
993 the hHVEM mutants. **(C)** Superimposition of the hHVEM:hCD160 from the ternary  
994 complex with hHVEM:hCD160 complex alone (grey cartoon, PDB entry 6NG3). **(D)**  
995 Superimposition of the hHVEM:hLIGHT from the ternary complex with hHVEM:hLIGHT  
996 complex alone (grey cartoon, PDB entry 4RSU). **(E)** Relative binding affinities of mHVEM  
997 single residue muteins with its ligands. Error bars represent results from at least triplicates.  
998 **(F)** Relative binding affinities of mHVEM multiple-residue muteins with its ligands. Error  
999 bars represent results from at least triplicates. **(G)** Representative flow cytometry results.  
1000 The vertical axis is the mCherry fluorescence indicating mHVEM-expressing cells and the  
1001 horizontal axis is the green fluorescence staining of fusion proteins or binding partner-  
1002 expressing cells, as indicated.  
1003

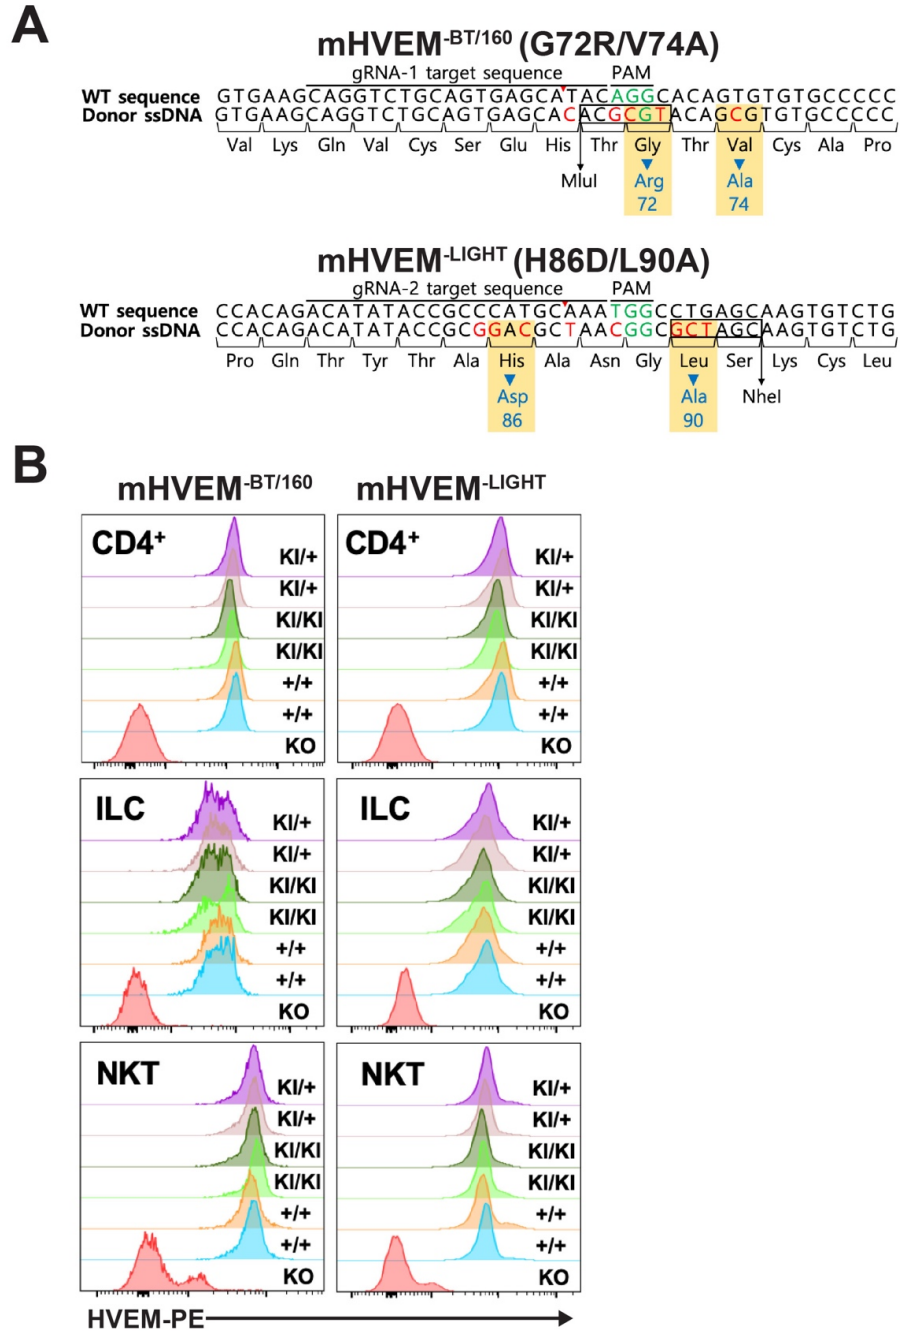

1004

1005 **Figure S4. Normal surface HVEM expression in mHVEM mutant mice.**

1006 **(A)** Schematic of nucleotide sequences of the HVEM gene in mHVEM mutant mouse  
 1007 strains (G72R/V74A: mHVEM<sup>-BT/160</sup>, loss of BTLA and CD160 binding; H86D/L90A:  
 1008 mHVEM<sup>-LIGHT</sup>, loss of LIGHT binding) that were generated by CRISPR-Cas9 editing of  
 1009 exon 3 of the *Tnfrsf14* locus. Red letters indicate mutated nucleotides. Green letters

1010 indicate PAM sequence. Blue letters indicate mutated amino acids. Black box shows  
1011 restriction enzyme sites. **(B)** HVEM surface expression level of splenic CD4<sup>+</sup> T cells, ILC  
1012 (CD3<sup>-</sup>Lin<sup>-</sup>CD90.2<sup>+</sup>), and iNKT cells (TCRβ<sup>+</sup>, CD1d tetramer<sup>+</sup>) from the indicated mice were  
1013 determined by flow cytometry. HVEM-knockout (KO) mouse plays as a negative control  
1014 of HVEM staining. KI = knockin allele.  
1015

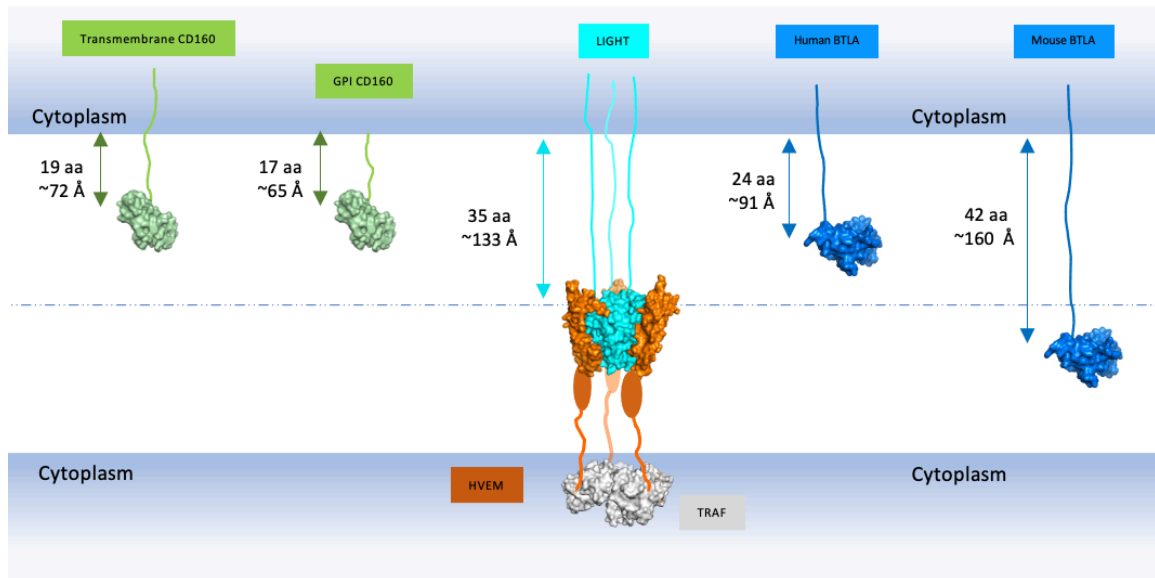

1016

1017 **Figure S5. Predicted maximum lengths of LIGHT, CD160 and BTLA stalk regions.**

1018 The globular domains of LIGHT, CD160 and BTLA are shown as surface structures and  
 1019 colored as cyan, green and blue, respectively. The CRDs of HVEM are shown as orange  
 1020 surfaces and the remainder of the CRD regions that were not visible in the structures are  
 1021 shown as orange ovals. The cytoplasmic TRAF molecule is shown as a grey surface. The  
 1022 stalk regions that connect the extracellular globular domains to the transmembrane  
 1023 segments are shown as lines. The maximum lengths of the stalk regions are calculated  
 1024 as if they adopt the fully extended structures. The length of GPI-anchored CD160 stalk  
 1025 region in the figure does not include the GPI length. Amino acids are denoted as “aa” in  
 1026 the figure. This figure indicates that when human membrane LIGHT binds to HVEM, the  
 1027 longer stalk lengths of LIGHT may prevent BTLA and CD160 binding to HVEM.
